# Supplementary material for: Club cells form lung adenocarcinomas and maintain the alveoli of adult mice
Source: eLife journal article supplement (doi:10.7554/elife.45571), 2019-05-29
Supplement: supp [file elife-45571-supp-v1.zip]

Archive with 63 entries (63 files):
- elife_poa_e45571_Figure_3_figure_supplement_4.pdf
- elife_poa_e45571_Figure_1_figure_supplement_13_source_data_1.xlsx
- elife_poa_e45571_Figure_1_figure_supplement_19.pdf
- elife_poa_e45571_Figure_3_figure_supplement_5_source_data_1.xlsx
- elife_poa_e45571_Figure_1_figure_supplement_14.pdf
- elife_poa_e45571_Figure_6_figure_supplement_2.pdf
- elife_poa_e45571_Figure_1_figure_supplement_18.pdf
- elife_poa_e45571_Figure_1_figure_supplement_9.pdf
- elife_poa_e45571_Figure_3_figure_supplement_3.pdf
- elife_poa_e45571_Figure_1_figure_supplement_7_source_data_1.xlsx
- elife_poa_e45571_Figure_1_figure_supplement_5.pdf
- elife_poa_e45571_Figure_3_figure_supplement_5.pdf
- elife_poa_e45571_Figure_1_figure_supplement_2.pdf
- elife_poa_e45571_Figure_1_figure_supplement_17.pdf
- elife_poa_e45571_Figure_5_source_data_1.xlsx
- elife_poa_e45571_Figure_4_figure_supplement_2.pdf
- elife_poa_e45571_Figure_1_figure_supplement_7.pdf
- elife_poa_e45571_Figure_1_figure_supplement_1.pdf
- elife_poa_e45571_Figure_2_source_data_1.xlsx
- elife_poa_e45571_Figure_6_source_data_3.xlsx
- elife_poa_e45571_Figure_1_figure_supplement_10.pdf
- elife_poa_e45571_Figure_2_source_data_2.xlsx
- elife_poa_e45571_Figure_6_figure_supplement_6.pdf
- elife_poa_e45571_Figure_6_figure_supplement_1.pdf
- elife_poa_e45571_Figure_1_figure_supplement_4_source_data_1.xlsx
- elife_poa_e45571_Figure_2_figure_supplement_1.pdf
- elife_poa_e45571_Figure_6_source_data_1.xlsx
- elife_poa_e45571_Figure_6_figure_supplement_3.pdf
- elife_poa_e45571_Figure_1_figure_supplement_12.pdf
- elife_poa_e45571_Figure_1_figure_supplement_5_source_data_1.xlsx
- elife_poa_e45571_Figure_6_source_data_2.xlsx
- elife_poa_e45571_Figure_1_figure_supplement_4.pdf
- elife_poa_e45571_Figure_1_figure_supplement_6.pdf
- elife_poa_e45571_Figure_1_figure_supplement_3.pdf
- elife_poa_e45571_Figure_1_figure_supplement_10_source_data_1.xlsx
- elife_poa_e45571_Figure_6_figure_supplement_4.pdf
- elife_poa_e45571_Figure_3_figure_supplement_2_source_data_1.pdf
- elife_poa_e45571_Figure_4_figure_supplement_3.pdf
- elife_poa_e45571_Figure_3_figure_supplement_2.pdf
- elife_poa_e45571_Figure_4_source_data_4.xlsx
- elife_poa_e45571_Figure_3_figure_supplement_1.pdf
- elife_poa_e45571_Figure_1_figure_supplement_13.pdf
- elife_poa_e45571_Figure_1_figure_supplement_16.pdf
- elife_poa_e45571_Figure_6_source_data_4.xlsx
- elife_poa_e45571_Figure_5_figure_supplement_1.pdf
- elife_poa_e45571_Figure_5_source_data_2.xlsx
- elife_poa_e45571_Figure_4_figure_supplement_4_source_data_1.xlsx
- elife_poa_e45571_Figure_5_figure_supplement_2.pdf
- elife_poa_e45571_Figure_1_figure_supplement_11.pdf
- elife_poa_e45571_Figure_6_figure_supplement_2_source_data_1.xlsx
- elife_poa_e45571_Figure_6_figure_supplement_5.pdf
- elife_poa_e45571_Figure_1_figure_supplement_15.pdf
- elife_poa_e45571_Figure_3_figure_supplement_6.pdf
- elife_poa_e45571_Figure_1_figure_supplement_8.pdf
- elife_poa_e45571_Figure_4_source_data_1.xlsx
- elife_poa_e45571_Figure_4_figure_supplement_2_source_data_1.xlsx
- elife_poa_e45571_Figure_4_figure_supplement_1.pdf
- elife_poa_e45571_Figure_1_figure_supplement_8_source_data_1.xlsx
- elife_poa_e45571_Figure_5_figure_supplement_2_source_data_1.xlsx
- elife_poa_e45571_Transparent_Reporting_File.pdf
- elife_poa_e45571_Figure_4_source_data_2.xlsx
- elife_poa_e45571_Figure_4_figure_supplement_4.pdf
- elife_poa_e45571_Figure_4_source_data_3.xlsx
