# Supplementary material for: Club cells form lung adenocarcinomas and maintain the alveoli of adult mice
Source: eLife journal article supplement (doi:10.7554/elife.45571), 2019-05-29
Supplement: supp [file elife-45571-supp-v1.zip › elife_poa_e45571_Figure_1_figure_supplement_1.pdf]

| Marker Protein | Official Name, Aliases                                                                                     | Target Lineage | Coding Gene    |                |
|----------------|------------------------------------------------------------------------------------------------------------|----------------|----------------|----------------|
|                |                                                                                                            |                | Human          | Mouse          |
| <b>TUBA1A</b>  | Tubulin, alpha 1a, acetylated tubulin                                                                      | Ciliated AEC   | <i>TUBA1A</i>  | <i>Tuba1a</i>  |
| <b>KRT5</b>    | Keratin 5                                                                                                  | Basal AEC      | <i>KRT5</i>    | <i>Krt5</i>    |
| <b>FOXJ1</b>   | Forkhead box J1                                                                                            | Goblet AEC     | <i>FOXJ1</i>   | <i>Foxj1</i>   |
| <b>CCSP</b>    | Secretoglobin, family 1A, member 1 (uterooglobin), Clara cell secretory protein, Clara cell 10 KDa protein | Club AEC, BASC | <i>SCGB1A1</i> | <i>Scgb1a1</i> |
| <b>SFTPC</b>   | Surfactant protein C                                                                                       | ATII, BASC     | <i>SFTPC</i>   | <i>Sftpc</i>   |
| <b>LYZ2</b>    | Lysozyme 2                                                                                                 | ATII, AMΦ      | <i>LYZ2</i>    | <i>Lyz2</i>    |
