# Supplementary material for: Club cells form lung adenocarcinomas and maintain the alveoli of adult mice
Source: eLife journal article supplement (doi:10.7554/elife.45571), 2019-05-29
Supplement: supp [file elife-45571-supp-v1.zip › elife_poa_e45571_Figure_1_figure_supplement_2.pdf]

| Strain Category   |      | CRE reporter                                          | CRE reporter x CRE driver intercrosses |                   |                            |                          |                            |                         |
|-------------------|------|-------------------------------------------------------|----------------------------------------|-------------------|----------------------------|--------------------------|----------------------------|-------------------------|
| Short Name        |      | TOMATO                                                | GFP; CCSP. Cre                         | GFP; SFTPC. Cre   | GFP; LYZ2. Cre             | GFP; SOX2. Cre           | GFP; VAV. Cre              | GFP; NES. Cre           |
| Full Name         |      | B6.129(Cg)-Gt(ROSA)26Sortm4(ACTB-tdTomato,-EGFP)Luo/J | B6;CBA-Tg(Scgb1a1-cre)1Vart/Flmg       | Tg(Sftpc-cre)1Blh | B6.129P2-Lyz2tm1(cre)lfo/J | B6.Cg-Tg(Sox2-cre)1Amc/J | B6.Cg-Tg(Vav1-icre)A2Kio/J | B6.Cg-Tg(Nes-cre)1Kln/J |
| Reference         |      | [25]                                                  | [26]                                   | [27]              | [18]                       | [28]                     | [29]                       | [30]                    |
| ID                |      | JAX # 007676                                          | EMMA # EM:04965                        | MGI # 3574949     | JAX # 004781               | JAX # 008454             | JAX # 008610               | JAX # 003771            |
| Background tested |      | C57BL/6 FVB                                           | C57BL/6 FVB                            | C57BL/6 FVB       | C57BL/6 FVB                | C57BL/6                  | C57BL/6                    | C57BL/6                 |
| Cells Labeled     | AEC  | -                                                     | +                                      | ±                 | -                          | +                        | -                          | ±                       |
|                   | ATII | -                                                     | -                                      | +                 | ±                          | +                        | -                          | -                       |
|                   | AMΦ  | -                                                     | -                                      | -                 | +                          | +                        | +                          | -                       |
|                   | BASC | -                                                     | +                                      | +                 | -                          | +                        | -                          | -                       |
|                   | BM   | -                                                     | -                                      | -                 | ±                          | +                        | +                          | -                       |
