# Supplementary material for: Club cells form lung adenocarcinomas and maintain the alveoli of adult mice
Source: eLife journal article supplement (doi:10.7554/elife.45571), 2019-05-29
Supplement: supp [file elife-45571-supp-v1.zip › elife_poa_e45571_Figure_1_figure_supplement_4_source_data_1.xlsx]

## Sheet: figure 1 supplement 4
	%GFP+ bronchial cells			%GFP+ alveolar cells
	mean	SD	n	mean	SD	n
TOMATO	0	0	5	0	0	5
GFP;CCSP.Cre	99.3	0.8367	5	0.92	0.4207	5
GFP;SFTPC.Cre	90.2	3.701	5	50.6	6.95	5
GFP;LYZ2.Cre	0.06	0.08944	5	35.6	5.128	5
GFP;SOX2.Cre	99.8	0.4472	5	99.7	0.4472	5
GFP;VAV.Cre	2.42	1.195	5	7.16	2.614	5
GFP;NES.Cre	5.46	2.038	5	2.44	0.9343	5
