# Supplementary material for: Club cells form lung adenocarcinomas and maintain the alveoli of adult mice
Source: eLife journal article supplement (doi:10.7554/elife.45571), 2019-05-29
Supplement: supp [file elife-45571-supp-v1.zip › elife_poa_e45571_Figure_1_figure_supplement_5_source_data_1.xlsx]

## Sheet: figure 1 supplement 5
	GFP+ cells						TOMATO+ cells
GFP;CCSP.CRE+	13	16	11	16	9		87	84	89	84	91
GFP;SFTPC.CRE+	25	30	34				75	70	66
GFP;LYZ2.CRE+	19	22	23	27	15	16	81	78	77	73	85	84
