# Supplementary material for: Club cells form lung adenocarcinomas and maintain the alveoli of adult mice
Source: eLife journal article supplement (doi:10.7554/elife.45571), 2019-05-29
Supplement: supp [file elife-45571-supp-v1.zip › elife_poa_e45571_Figure_1_figure_supplement_7_source_data_1.xlsx]

## Sheet: figure 1 supplement 7
	%GFP+ CCSP+ cells			%GFP+ SFTPC+ cells
	mean	SD	n	mean	SD	n
TOMATO	0	0	5	0	0	5
GFP;CCSP.Cre	99.9	0.2236	5	2.86	1.629	5
GFP;SFTPC.Cre	78.2	7.396	5	98.2	1.483	5
GFP;LYZ2.Cre	0.1	0.1225	5	60.2	11.12	5
GFP;SOX2.Cre	99.66	0.4219	5	100	0	5
GFP;VAV.Cre	0.06	0.08944	5	0.24	0.1673	5
GFP;NES.Cre	1.9	0.7937	5	0.1	0.1225	5
