# Supplementary material for: Club cells form lung adenocarcinomas and maintain the alveoli of adult mice
Source: eLife journal article supplement (doi:10.7554/elife.45571), 2019-05-29
Supplement: supp [file elife-45571-supp-v1.zip › elife_poa_e45571_Figure_1_figure_supplement_8_source_data_1.xlsx]

## Sheet: figure 1 supplement 8
		Protein labelling
		CCSP+ airway cells						SFTPC+ alveolar cells						LYZ2+ alveolar cells
Genetic markings	GFP;CCSP.CRE+ cells	0.65	0.49	0.78	0.82	0.69	0.72	0	0.01	0	0	0.01	0.03	0	0	0.01	0	0	0.01
	GFP;SFTPC.CRE+ cells	0.74	0.6	0.9	0.5	0.8	0.85	0.96	0.95	0.92	0.98	0.96	0.99	0.469	0.44	0.488	0.502	0.43	0.56
	GFP;LYZ2.CRE+ cells	0	0	0.01	0.01	0.03	0.04	0.694	0.647	0.714	0.699	0.58	0.62	0.92	0.93	0.89	0.96	0.87	0.91
