# Supplementary material for: Club cells form lung adenocarcinomas and maintain the alveoli of adult mice
Source: eLife journal article supplement (doi:10.7554/elife.45571), 2019-05-29
Supplement: supp [file elife-45571-supp-v1.zip › elife_poa_e45571_Figure_1_figure_supplement_10_source_data_1.xlsx]

## Sheet: figure 1 supplement 10
XY data summary (large circles with error bars)								Urethane scatter data			MCA/BHT scatter data
Each row represents the mean of each carcinogen regimen								Each row represents one mouse			Each row represents one mouse
	number			mean diameter (mm)				mean tumor number/mouse	mean tumor diameter/mouse (mm)		mean tumor number/mouse	mean tumor diameter/mouse (mm)
	mean	SD	n	mean	SD	n		2	0.5		6	0.26
EC	4.405	3.387	84	0.5431	0.273	84		3	0.6		8	0.228
MCA/BHT	4.75	3.226	20	0.6767	0.6062	20		0	0.2		14	0.22
								1	0.25		5	0.22
								5	0.55		3	0.15
								6	0.68		3	0.15
								10	0.9		3	0.25
								2	1		3	0.27
								11	0.3		2	0.15
								1	0.46		6	1.2
								0	0		0	0
								3	0.7		0	0
								3	0.73		6	1.16667
								3	0.57		7	0.742857
								2	0.5		6	1.26667
								7	0.51		4	1.375
								4	0.7		7	1.47143
								4	0.48		1	1.6
								1	0.8		7	1.71429
								6	0.6		4	1.1
								6	0.85
								8	0.7
								4	0.73
								2	0.4
								6	0.58
								8	0.76
								11	0.84
								4	0.9
								8	0.73
								7	0.49
								2	0.45
								3	0.4
								2	0.55
								4	0.53
								4	0.63
								9	0.62
								0	0
								0	0
								0	0
								9	0.57
								2	0.7
								2	0.6
								1	0.4
								8	0.6
								8	0.55
								9	0.6
								2	0.8
								3	0.933
								5	0.68
								0	0
								2	0.9
								2	0.45
								14	0.78
								2	0.75
								7	0.56
								8	0.56
								0	0
								6	0.67
								15	0.63
								0	0
								1	0.7
								1	1
								7	0.37
								5	0.64
								5	0.86
								8	0.55
								10	0.84
								5	0.7
								3	0.8
								5	0
								6	0.6
								1	0.5333
								0	0
								6	0.58
								2	0.4
								5	0
								4	0.525
								2	0.65
								4	0.5
								6	0.4
								5	0
								9	0.5
								3	0.35
								0	1.2
