# Supplementary material for: Club cells form lung adenocarcinomas and maintain the alveoli of adult mice
Source: eLife journal article supplement (doi:10.7554/elife.45571), 2019-05-29
Supplement: supp [file elife-45571-supp-v1.zip › elife_poa_e45571_Figure_1_figure_supplement_13_source_data_1.xlsx]

## Sheet: figure 1 supplement 13
	GFP+ tumors/lung (%)			GFP+ cells/tumor (%)
	mean	SD	n	mean	SD	n
TOMATO	0	0	30	0	0	30
GFP;CCSP.Cre	81.68	21.56	22	37.3	18.72	22
GFP;SFTPC.Cre	94.28	12.25	18	82.6	22.9	18
GFP;LYZ2.Cre	48.24	25.75	20	43	1.414	20
