# Supplementary material for: Club cells form lung adenocarcinomas and maintain the alveoli of adult mice
Source: eLife journal article supplement (doi:10.7554/elife.45571), 2019-05-29
Supplement: supp [file elife-45571-supp-v1.zip › elife_poa_e45571_Figure_2_source_data_1.xlsx]

## Sheet: figure 2a
	LYZ2+					LYZ2-					CCSP+					CCSP-
1 week	5.31211	20.118	10.254	15.444	13.258	13	10	18.456	22.142	7.521	1.89867	7.29033	14.236	21.425	8.889	5	24	14.443	17.555	8.7814
2 weeks	0.762134	0.058997	0.365	1.424	0.699	2	2	0.215	1.238	0.568	8.5472	3.88175	5.478	10.214	6.993	1	0	0.023	0.478	0.669
