# Supplementary material for: Club cells form lung adenocarcinomas and maintain the alveoli of adult mice
Source: eLife journal article supplement (doi:10.7554/elife.45571), 2019-05-29
Supplement: supp [file elife-45571-supp-v1.zip › elife_poa_e45571_Figure_2_source_data_2.xlsx]

## Sheet: figure 2c
	Airway attachment										Endobronchial										No airway link
μCT	5	4	3	4	3	2	4	5	5	3	1	2	0	2	1	3	1	1	0	2	2	1	2	2	4	1	3	0	3	2
Pathology	3	4	5	6	3	2	6	2	6	3	1	0	1	1	0	1	3	2	0	3	1	2	0	1	1	2	0	1	2	2
