# Supplementary material for: Club cells form lung adenocarcinomas and maintain the alveoli of adult mice
Source: eLife journal article supplement (doi:10.7554/elife.45571), 2019-05-29
Supplement: supp [file elife-45571-supp-v1.zip › elife_poa_e45571_Figure_3_figure_supplement_5_source_data_1.xlsx]

## Sheet: figure 3 supplement 5
days post-urethane	saline							urethane
0	19.89	7.705	17.48	8.836	18.27	13.88		13.6	12.68	7.285	21.12	8.275
150	10.47	8.957	10.91	11.59	13.6	8.638		14.1	15.41	12.71	13.2	17.52
210	9.217	4.358	5.433	11.04	10.36	7.4		26.26	25.94	16.02	33.77	22.02
