# Supplementary material for: Club cells form lung adenocarcinomas and maintain the alveoli of adult mice
Source: eLife journal article supplement (doi:10.7554/elife.45571), 2019-05-29
Supplement: supp [file elife-45571-supp-v1.zip › elife_poa_e45571_Figure_4_figure_supplement_2_source_data_1.xlsx]

## Sheet: figure 4 supplement 2
	Saline												Bleomycin
GFP+ tumors/lung	100	75	87.5	92	80	80							90	87.5	75	100	90	80
GFP+ cells/tumor	40	40	40	40	40	40	20	12	60	40	80	80	40	80	100	80	100	40	40	40	80	100	80	100
