# Supplementary material for: Club cells form lung adenocarcinomas and maintain the alveoli of adult mice
Source: eLife journal article supplement (doi:10.7554/elife.45571), 2019-05-29
Supplement: supp [file elife-45571-supp-v1.zip › elife_poa_e45571_Figure_4_figure_supplement_4_source_data_1.xlsx]

## Sheet: figure 4 supplement 4
Days post-naphthalene	0	4	7	42
GFP+ airway cells (%)	100	84	95	99
	100	92	95	91
	100	90	92	99
	99	74	91	97
	98	82	88	98
	100	95	96	98
