# Supplementary material for: Club cells form lung adenocarcinomas and maintain the alveoli of adult mice
Source: eLife journal article supplement (doi:10.7554/elife.45571), 2019-05-29
Supplement: supp [file elife-45571-supp-v1.zip › elife_poa_e45571_Figure_4_source_data_1.xlsx]

## Sheet: figure 4b
age (months)	0.5	1.5	6	15
	7	15.5	28.5	49.4
	2.85	5	32	42
	0	4.5	14	50
	1	14.33	25	62
	0	23.67	44	45
