# Supplementary material for: Club cells form lung adenocarcinomas and maintain the alveoli of adult mice
Source: eLife journal article supplement (doi:10.7554/elife.45571), 2019-05-29
Supplement: supp [file elife-45571-supp-v1.zip › elife_poa_e45571_Figure_4_source_data_2.xlsx]

## Sheet: figure 4d
	SFTPC+						GFP+						GFP+/SFTPC+
days post-bleomycin	0	14	28	42	56		0	14	28	42	56		0	14	28	42	56
	244.67	213	225	174.75	217.67		10.67	9	25	24	35.33		0.04587	0.0414	0.15579	0.13505	0.16239
	391.5	162.75	255.25	209.75	285.25		18.75	4.75	27	21.75	43.75		0.05154	0.03228	0.10746	0.1031	0.15185
	185.75	184	345.5	258.75	206.75		5.75	7	22.5	37	42.75		0.03108	0.03862	0.06456	0.14164	0.20468
	253.25	279.75	231	295.75	264.33		5.25	9.25	16.25	22.75	31.33		0.0233	0.0332	0.07028	0.07843	0.11479
