# Supplementary material for: Club cells form lung adenocarcinomas and maintain the alveoli of adult mice
Source: eLife journal article supplement (doi:10.7554/elife.45571), 2019-05-29
Supplement: supp [file elife-45571-supp-v1.zip › elife_poa_e45571_Figure_4_source_data_3.xlsx]

## Sheet: figure 4f
	Mean linear intercept			GFP+/SFTPC+
O2	21%	98%		21%	98%
	3.41	5.76		0.05155	0.1828
	4.33	5.83		0.0256	0.1945
	4.2	6.32		0.0233	0.2293
	4.53	7.89		0.04587	0.1748
	3.87	6.48		0.0315	0.3104
	3.77	6.04		0.04987	0.2468
