# Supplementary material for: Club cells form lung adenocarcinomas and maintain the alveoli of adult mice
Source: eLife journal article supplement (doi:10.7554/elife.45571), 2019-05-29
Supplement: supp [file elife-45571-supp-v1.zip › elife_poa_e45571_Figure_4_source_data_4.xlsx]

## Sheet: figure 4h
	Alveoli of CCSP.CRE mice					Airways of LYZ2.CRE mice
Corn oil	0.0745	0.0456	0.06621	0.05554	0.0489	0.001	0.002	0	0	0.006
Naphthalene	0.1547	0.1985	0.2241	0.1468	0.2648	0.001	0.002	0	0	0.006
