# Supplementary material for: Club cells form lung adenocarcinomas and maintain the alveoli of adult mice
Source: eLife journal article supplement (doi:10.7554/elife.45571), 2019-05-29
Supplement: supp [file elife-45571-supp-v1.zip › elife_poa_e45571_Figure_5_figure_supplement_2_source_data_1.xlsx]

## Sheet: figure 5 supplement 2
	GFP;CCSP.CRE						GFP;CCSP.CRE;DTA						GFP;LYZ2.CRE						GFP;LYZ2.CRE;DTA
GFP+ airway cells	95	99	99	98	93	96	0	0	0.1	0.2	0	0.1	0	0	0.1	0	0	0.2	0	0	0.1	0	0.2	0
GFP+ alveolar cells	1	0.2	0.5	0.1	0	0.3	0	0	0.1	0.1	0	0	35	45	29	40	53	37	3	5	9	8	3	4
