# Supplementary material for: Club cells form lung adenocarcinomas and maintain the alveoli of adult mice
Source: eLife journal article supplement (doi:10.7554/elife.45571), 2019-05-29
Supplement: supp [file elife-45571-supp-v1.zip › elife_poa_e45571_Figure_5_source_data_1.xlsx]

## Sheet: figure 5c
PV curve	Pressure (cmH2O)	Volume (mL)										Mean linear intercept				CD45+/CD11b+ BAL cells (%)
		mean	SD	N	mean	SD	N	mean	SD	N		DTA/CCSP.CRE;DTA/LYZ2.CRE;DTA	CCSP.CRE;DTA	LYZ2.CRE;DTA		DTA/CCSP.CRE;DTA/LYZ2.CRE;DTA	CCSP.CRE;DTA	LYZ2.CRE;DTA
DTA/CCSP.CRE;DTA/LYZ2.CRE;DTA	2.84905	0.000100656	0.000366809	6								3.22	15.4	3.12		1.05	1.35	2.03
	4.7375	0.0984153	0.0182504	6								3.54	12.93	4.1		1.22	31.32	8.14
	6.51945	0.213657	0.0420229	6								4.84	11.66	3.66		3.12	15.9	4.07
	8.05033	0.331995	0.0625635	6								3.02	13.24	3.45		4.53	4.26	2.51
	9.56892	0.452077	0.0834103	6								3.83	15.01	4.1		4.07	10.86	1.62
	11.1128	0.569657	0.104736	6								3.71	12.98	4.46		4.38	17.19	3.12
	13.279	0.68397	0.121524	6												10.15	28.85	6.33
	17.054	0.789502	0.13388	6												6.06	18.85	3.73
	12.4923	0.699133	0.12269	6												10.35	25.37
	9.92557	0.582838	0.105356	6												3.32
	8.20163	0.463385	0.0856817	6
	6.59412	0.340223	0.0632789	6
	5.0704	0.216893	0.042751	6								Airway resistance				Static compliance
	3.29697	0.0940748	0.0232949	6								(cmH2O/mL/s)				(mL/cmH2O)
	1.18801	-0.0258537	0.00993415	6								DTA/CCSP.CRE;DTA/LYZ2.CRE;DTA	CCSP.CRE;DTA	LYZ2.CRE;DTA		DTA/CCSP.CRE;DTA/LYZ2.CRE;DTA	CCSP.CRE;DTA	LYZ2.CRE;DTA
CCSP.CRE.DTA	3.00825				3.88571e-05	0.000224178	6					0.279737	0.200907	0.2835		0.07994	0.106553	0.047219
	4.28748				0.0893418	0.0131348	6					0.293877	0.210187	0.32805		0.069776	0.118995	0.042536
	5.45603				0.192038	0.0304336	6					0.259053	0.244493	0.30115		0.070062	0.09346	0.048436
	6.5411				0.301628	0.0406765	6					0.236697	0.194943	0.27011		0.072265	0.114677	0.053005
	7.55215				0.408957	0.0578446	6					0.259487	0.221147	0.22082		0.094243	0.095403	0.097507
	8.60857				0.519042	0.0705794	6					0.25132	0.26179	0.269813		0.084385	0.123087	0.074398
	9.624				0.625775	0.0851715	6
	10.7673				0.73426	0.0985341	6
	9.04685				0.64222	0.0867105	6
	7.67918				0.53461	0.0706435	6
	6.5319				0.42514	0.0562602	6
	5.49012				0.314672	0.040563	6
	4.46663				0.203137	0.0262121	6
	3.33768				0.0917708	0.0123346	6
	2.141				-0.0191008	0.0041187	6
LYZ2.CRE.DTA	2.84183							-3.43912e-05	0.000199227	6
	4.81792							0.0843878	0.0239076	6
	6.79375							0.183548	0.0545641	6
	8.69617							0.288985	0.0783034	6
	10.3994							0.389588	0.107287	6
	12.3863							0.49124	0.130096	6
	15.3618							0.58707	0.153207	6
	19.7477							0.671292	0.17767	6
	14.4315							0.60187	0.157435	6
	10.9787							0.506687	0.135438	6
	8.86447							0.401712	0.111159	6
	7.0705							0.293968	0.0833644	6
	5.22263							0.186945	0.0567638	6
	3.21433							0.0817238	0.0305689	6
	1.04207							-0.023541	0.00486018	6
