# Supplementary material for: Club cells form lung adenocarcinomas and maintain the alveoli of adult mice
Source: eLife journal article supplement (doi:10.7554/elife.45571), 2019-05-29
Supplement: supp [file elife-45571-supp-v1.zip › elife_poa_e45571_Figure_5_source_data_2.xlsx]

## Sheet: figure 5e
Lung tumor number				Lung tumor diameter (mm)
DTA/CCSP.CRE;DTA/LYZ2.CRE;DTA	CCSP.CRE;DTA	LYZ2.CRE;DTA		DTA/CCSP.CRE;DTA/LYZ2.CRE;DTA	CCSP.CRE;DTA	LYZ2.CRE;DTA
1	0	1		0.4	0	0.3
2	0	0		0.7	0	0
9	0	0		0.511111	0	0
5	0	0		0.64	0	0
0	2	1		0	0.7	0.4
1	0	0		0.4	0	0
6	1	0		0.466667	0.6	0
13	0	0		0.738462	0	0
4	1	0		0.45	0.65	0
4	0	0		0.6	0	0
1		0		0.4		0
3		2		0.733333		0.2
3		0		0.333333		0
5		2		0.46		0.5
3		2		0.666667		1.1
1		0		0.4		0
1		3		0.4		0.73
2		3		0.4		0.46
1		2		0.4		0.7
4		0		0.45		0
10		0		0.53		0
2		0		0.45		0
2				0.55
2				0.6
4				0.45
2				0.5
2				0
0				0.45
1				0.9
2				0.5
0				0
1				2.2
6				0.7
1				0.6
0				0
2				0.8
1				0.4
0				0
1				0.4
1				0.4
1				1.3
3				0.8
