# Supplementary material for: Club cells form lung adenocarcinomas and maintain the alveoli of adult mice
Source: eLife journal article supplement (doi:10.7554/elife.45571), 2019-05-29
Supplement: supp [file elife-45571-supp-v1.zip › elife_poa_e45571_Figure_6_figure_supplement_2_source_data_1.xlsx]

## Sheet: figure 6 supplement 2
	Actg1		Scgb1a1		Tuba1a		Foxj1		Muc5ac		Sftpc		Lyz2
naive lung	0.985465	1.01236	201.52	205.236	15.262	14.996	1.90808	2.1245	0.8266	0.9856	113.975	115.966	40.543	41.6352
1 wk post-urethane	0.82275	0.985458	192.923	201.333	12.8905	12.9985	2.53877	2.4235	0.94506	0.84578	121.396	115.897	35.102	32.365
mouse lung adenocarcinoma cells	0.9215	0.998547	0.20732	0.321	8.41755	8.6425	0.56983	0.4458	0.59987	0.6354	0.52708	0.6485	0.46813	0.33362
	Actg1		Muc1		Krt20		Krt7		Krt5		Krt6a		Krt34		Krt35		Ncam1		Chga		Syp
naive	0.985465	1.01236	13.4488	14.225	0.52587	0.4524	6.37714	5.6896	2.82157	3.1245	0.38323	0.4125	1.09236	1.05632	0.71697	0.88965	0.73412	0.8659	1.21107	1.332	1.83473	1.9652
1 wk post-urethane	0.82275	0.985458	19.6004	21.3365	0.65372	0.6235	4.79473	5.2314	1.39043	1.6352	0.29378	0.3352	0.80496	0.6859	1.57186	1.3296	0.44045	0.52364	1.59168	1.6664	1.54912	1.6325
mouse lung adenocarcinoma cells	0.9215	0.998547	13.3417	12.356	32.5657	34.5632	5.26152	5.5632	0.87566	0.63266	0.52443	0.63998	0.66978	0.7542	0.86052	0.93265	0.45943	0.337124	0.70557	0.8652	0.97892	1.0123
	Scgb1a1			Sftpc
naive	285.834	309.828	336.175	205.698	219.984	326.167
1 wk post-urethane	265.895	250.263	299.856	159.525	188.256	220.314
mouse lung adenocarcinoma cells	0.00222098	0.0385419	0.0400289	0.000922031	0.044255	0.0303035
