# Supplementary material for: Club cells form lung adenocarcinomas and maintain the alveoli of adult mice
Source: eLife journal article supplement (doi:10.7554/elife.45571), 2019-05-29
Supplement: supp [file elife-45571-supp-v1.zip › elife_poa_e45571_Figure_6_source_data_1.xlsx]

## Sheet: figure 6b
	AEC																														ATII
Lung	12.81	10.75	10.7	10.78	11.59	11.27	11.73	10.78	10.45	10.33	9.51	8.84	8.4	8.05	12.04	11.23	8.38	8.26	8.75	9.81	11.15	8.97	8.05	8.84	7.24	9.24	10.41	6.27	13.05	8.81	10.75	10.7	11.59	11.27	10.78	10.45	8.17	9.51	9.62	10.05	9.44	10.1	8.58	7.78	12.04	11.23	8.25	11.15	8.05
LUAD cells	13.09	12.42	10.47	5.06	11.36	11.98	11.89	10.42	10.16	11.11	11.01	10.53	9.65	10.07	5.65	11.66	11.41	11.89	9.65	10.37	9.1	9.75	8.3	10.37	10.44	10.13	9.88	9.35	3.89	3.64	12.42	10.47	11.36	11.98	10.42	10.16	8.34	10.42	8.34	5.24	5.15	6.86	5.74	6.75	5.65	11.66	6.62	9.1	8.3
[truncated: 41 more columns]
