# Supplementary material for: Club cells form lung adenocarcinomas and maintain the alveoli of adult mice
Source: eLife journal article supplement (doi:10.7554/elife.45571), 2019-05-29
Supplement: supp [file elife-45571-supp-v1.zip › elife_poa_e45571_Figure_6_source_data_2.xlsx]

## Sheet: figure 6d
	LUNG																														LUAD
AEC	7.37	4.43	4.48	7.05	11.46	7.34	5.48	5.77	7.9	6.52	6.04	4.37	6.92	5.5	11.15	10.88	11.22	6.35	11.71	5.97	5.65	6.35	5.36	11.11	5.4	5.87	8.74	5.26	6.16	10.35	9.84	7.08	6.96	9.75	9.04	10.1	8.6	8.36	10.46	8.87	8.63	7.19	9.28	8.77	13.51	7.82	13.58	8.79	8.9
ATII	12.97	13.7	7.05	10.3	10.77	6.92	7.37	12.08	7.34	5.97	11.66	11.34	10.23	5.5	10.71	11.15	4.37	11.71	5.5	11.22	4.37	8.74	5.48	7.9	12.02	11.11	6.35	5.87	11.52	7.01	9.74	10.29	9.75	5.42	6.85	9.28	9.84	8.63	10.1	8.35	8.88	8.55	7.41	8.77	7.52	13.51	7.19	8.9	8.78
AMΦ	7.85	7.23	7.15	10.88	10.67	8.06	5.05	6.04	11.46	10.55	4.49	11.22	11.15	10.35	5.19	11.51	10.85	6.2	8.74	7.68	11.3	12.7	12.7	6.84	9.95	8.35	8.95	10.07	11.4	11.34	10.34	9.59	12.26	7.82	6.52	11.33	8.35	8.63	9.04	8.02	9.18	13.58	13.51	12.76	7.76	8.3	13.44	10.17	11.29
[truncated: 11 more columns]
