# Supplementary material for: Club cells form lung adenocarcinomas and maintain the alveoli of adult mice
Source: eLife journal article supplement (doi:10.7554/elife.45571), 2019-05-29
Supplement: supp [file elife-45571-supp-v1.zip › elife_poa_e45571_Figure_6_source_data_3.xlsx]

## Sheet: figure 6e
	AEC		ATII		BMDM
Lung	4.35292	5.21437	4.38903	5.00742	3.91432	4.83013
LUAD	3.83684	4.63555	2.84701	3.94335	3.16795	4.42971
