# Supplementary material for: Club cells form lung adenocarcinomas and maintain the alveoli of adult mice
Source: eLife journal article supplement (doi:10.7554/elife.45571), 2019-05-29
Supplement: supp [file elife-45571-supp-v1.zip › elife_poa_e45571_Figure_6_source_data_4.xlsx]

## Sheet: figure 6f
	AEC		ATII		AMΦ
Lung	6.48148	3.7918	6.76179	4.85025	6.01221	4.67498
LUAD	6.8296	3.83784	7.346	4.90803	6.78737	5.166
