# Supplementary figures and images for: Club cells form lung adenocarcinomas and maintain the alveoli of adult mice
Source: eLife journal article supplement (doi:10.7554/elife.45571), 2019-05-29

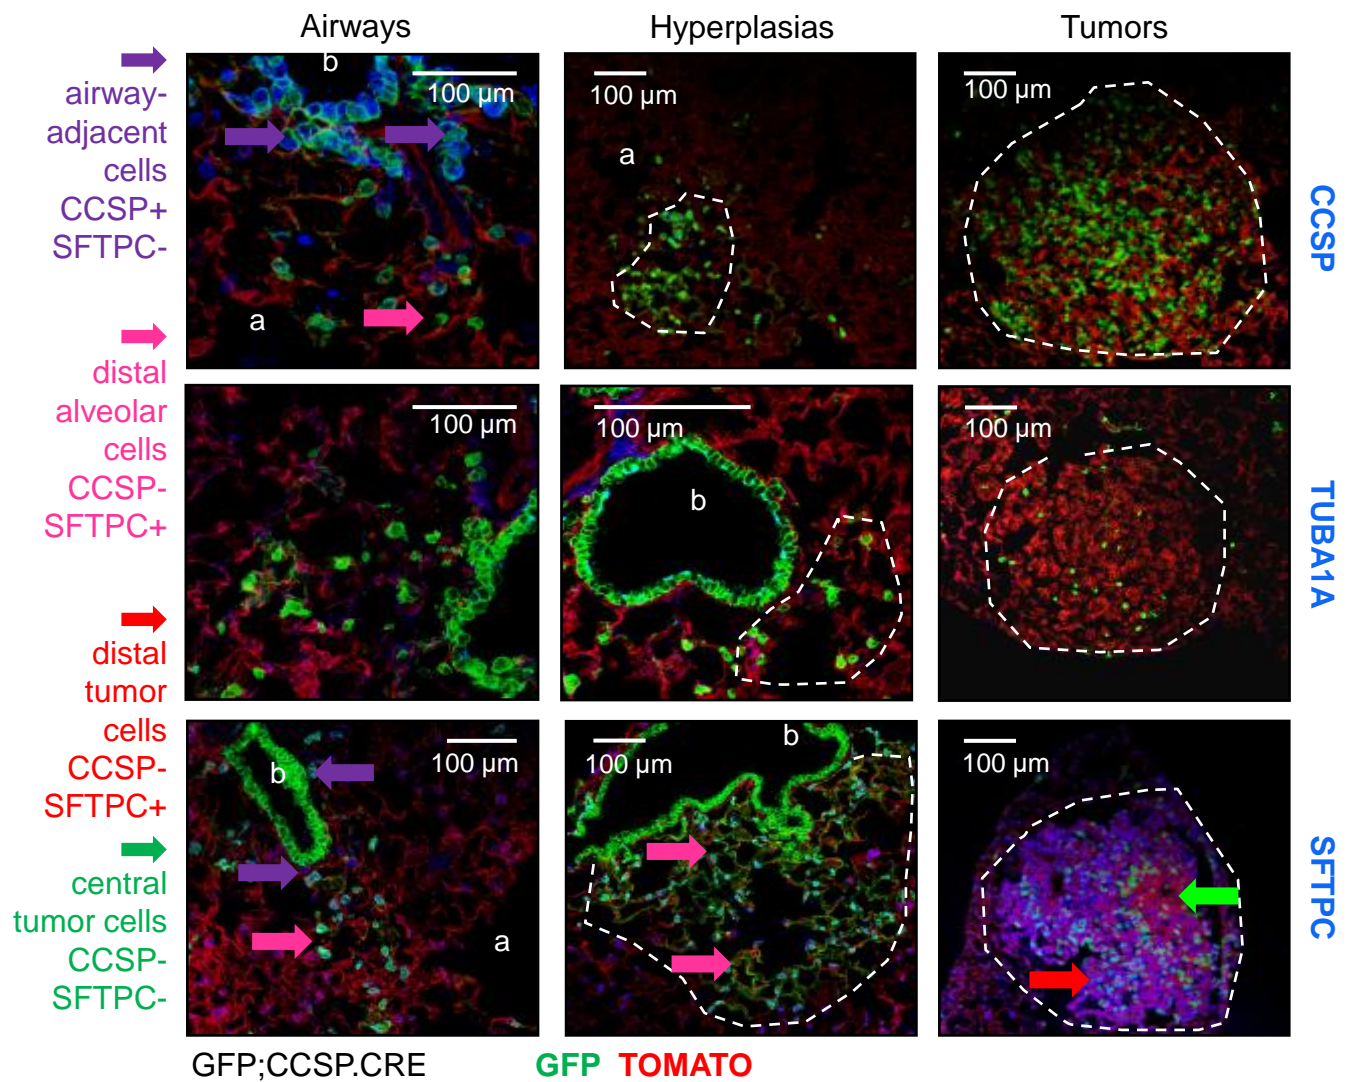

**Figure 3 - Figure Supplement 4**

Supplement: supp [file elife-45571-supp-v1.zip › elife_poa_e45571_Figure_3_figure_supplement_4.pdf]

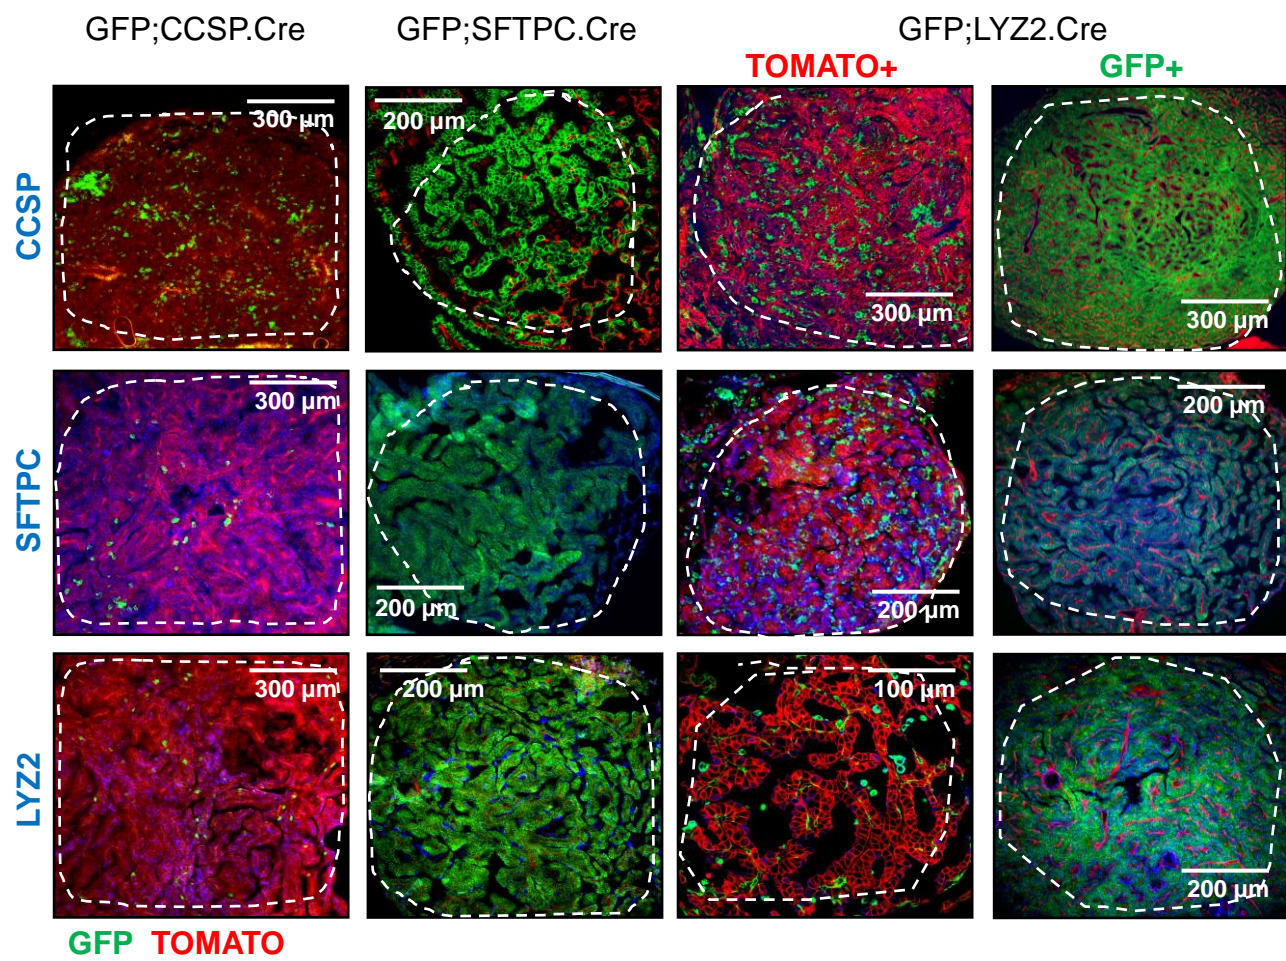

Supplement: supp [file elife-45571-supp-v1.zip › elife_poa_e45571_Figure_1_figure_supplement_19.pdf]

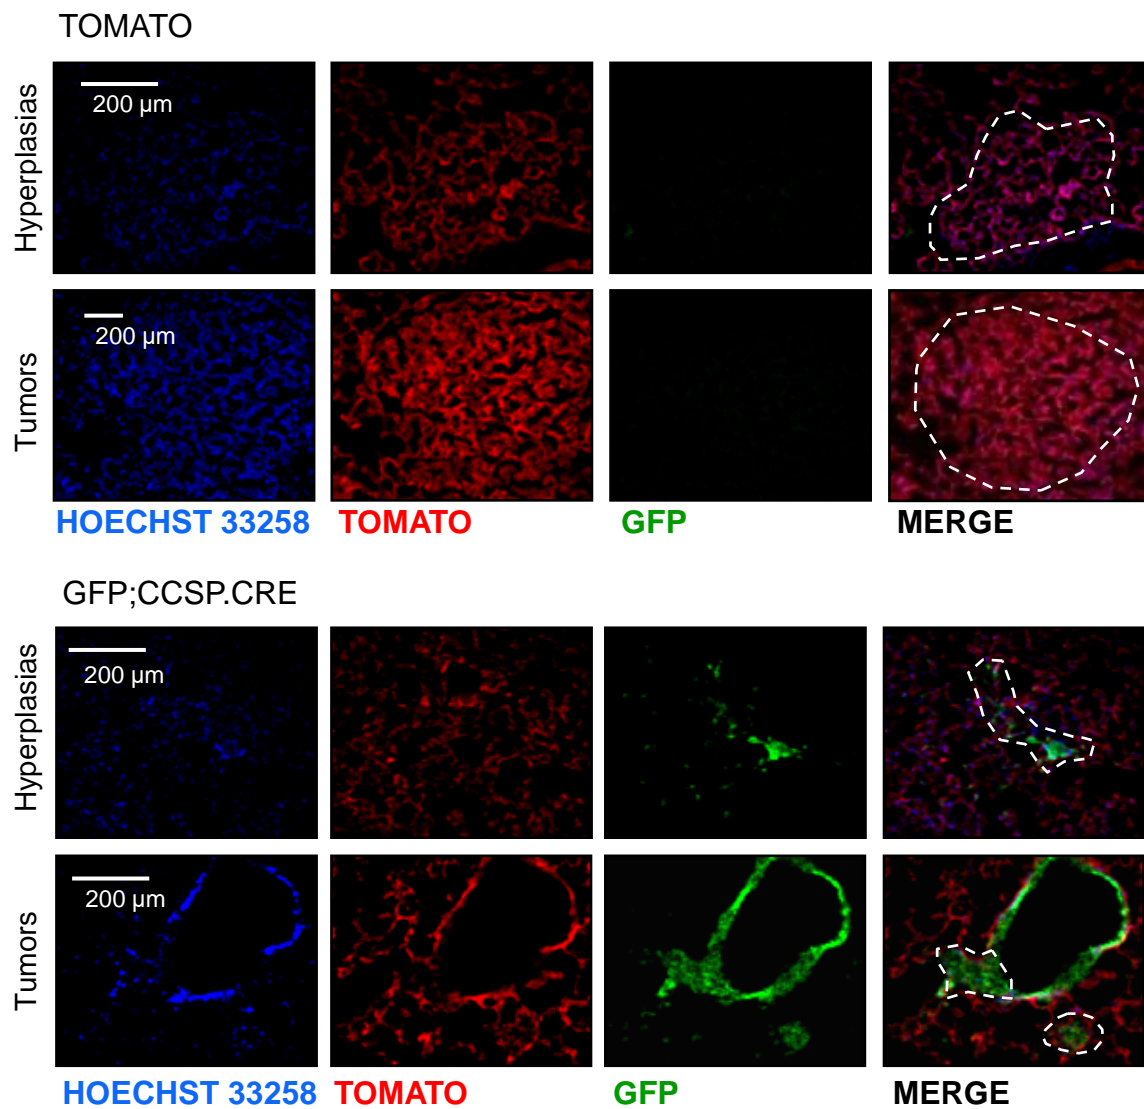

Supplement: supp [file elife-45571-supp-v1.zip › elife_poa_e45571_Figure_1_figure_supplement_14.pdf]

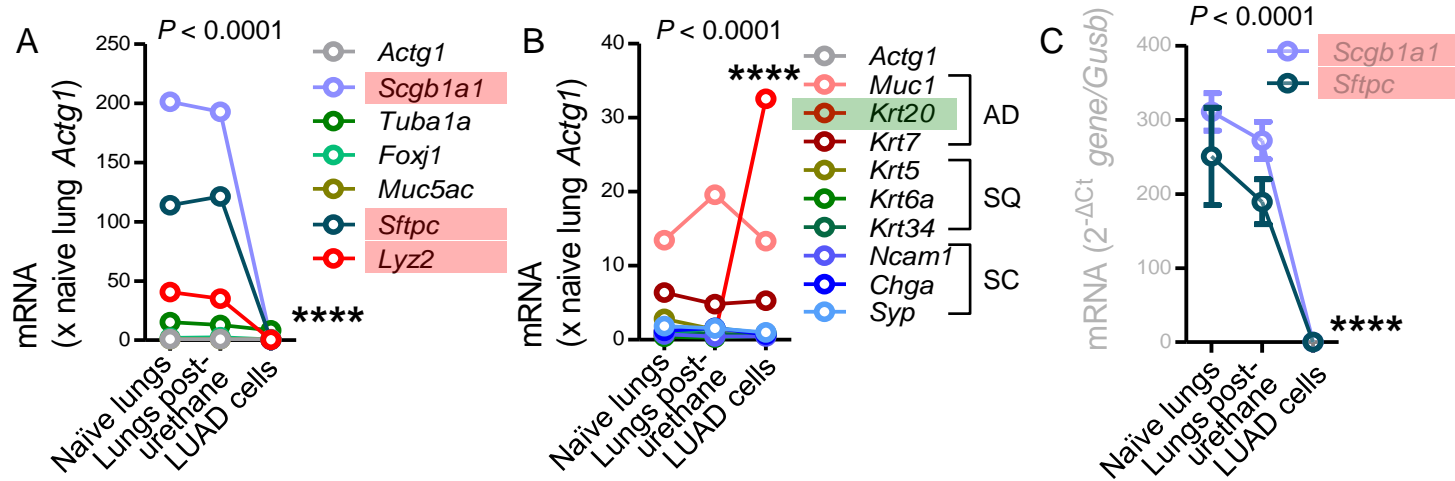

Figure 6 - Figure Supplement 2

Supplement: supp [file elife-45571-supp-v1.zip › elife_poa_e45571_Figure_6_figure_supplement_2.pdf]

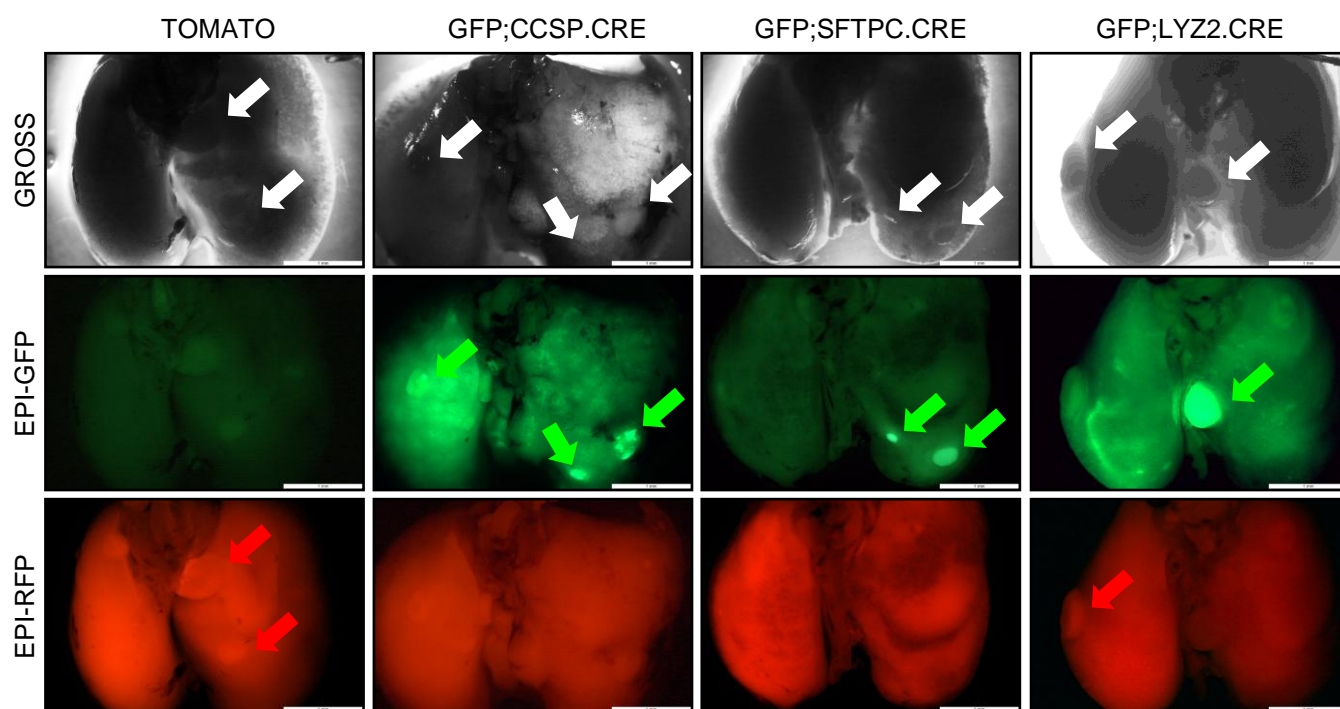

**Figure 1 - Figure Supplement 18**

Supplement: supp [file elife-45571-supp-v1.zip › elife_poa_e45571_Figure_1_figure_supplement_18.pdf]

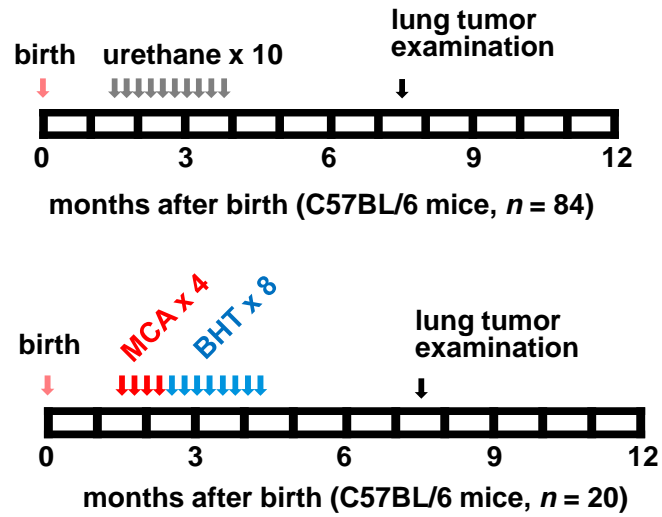

Supplement: supp [file elife-45571-supp-v1.zip › elife_poa_e45571_Figure_1_figure_supplement_9.pdf]

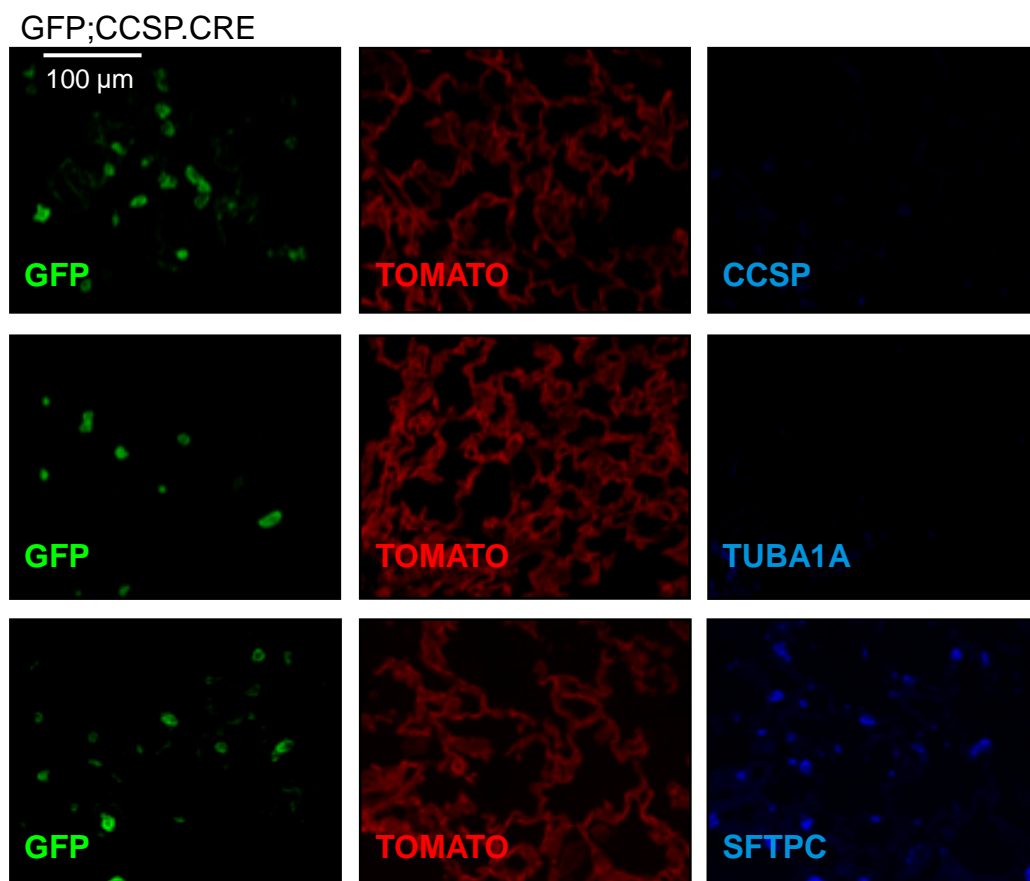

Supplement: supp [file elife-45571-supp-v1.zip › elife_poa_e45571_Figure_3_figure_supplement_3.pdf]

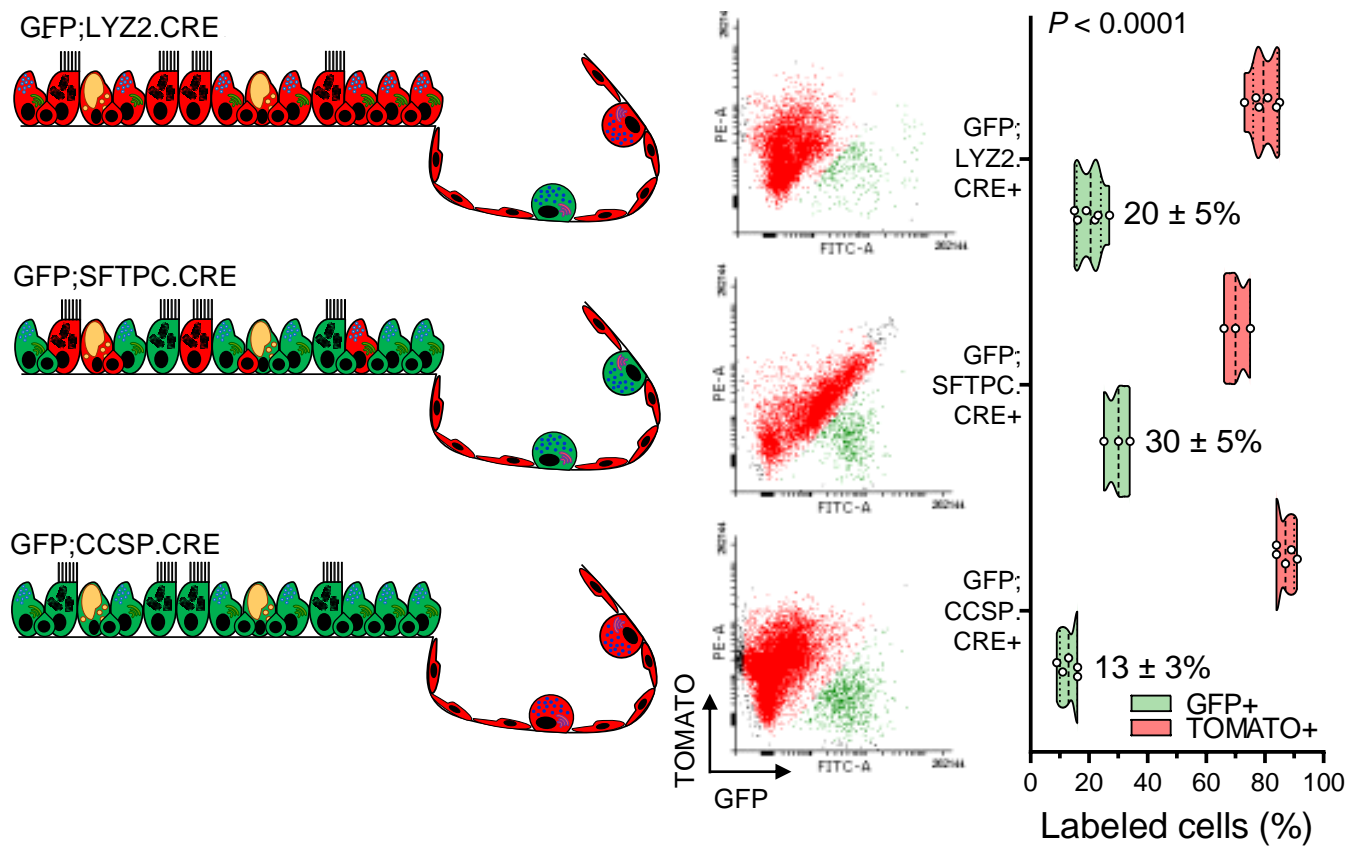

**Figure 1 - Figure Supplement 5**

Supplement: supp [file elife-45571-supp-v1.zip › elife_poa_e45571_Figure_1_figure_supplement_5.pdf]

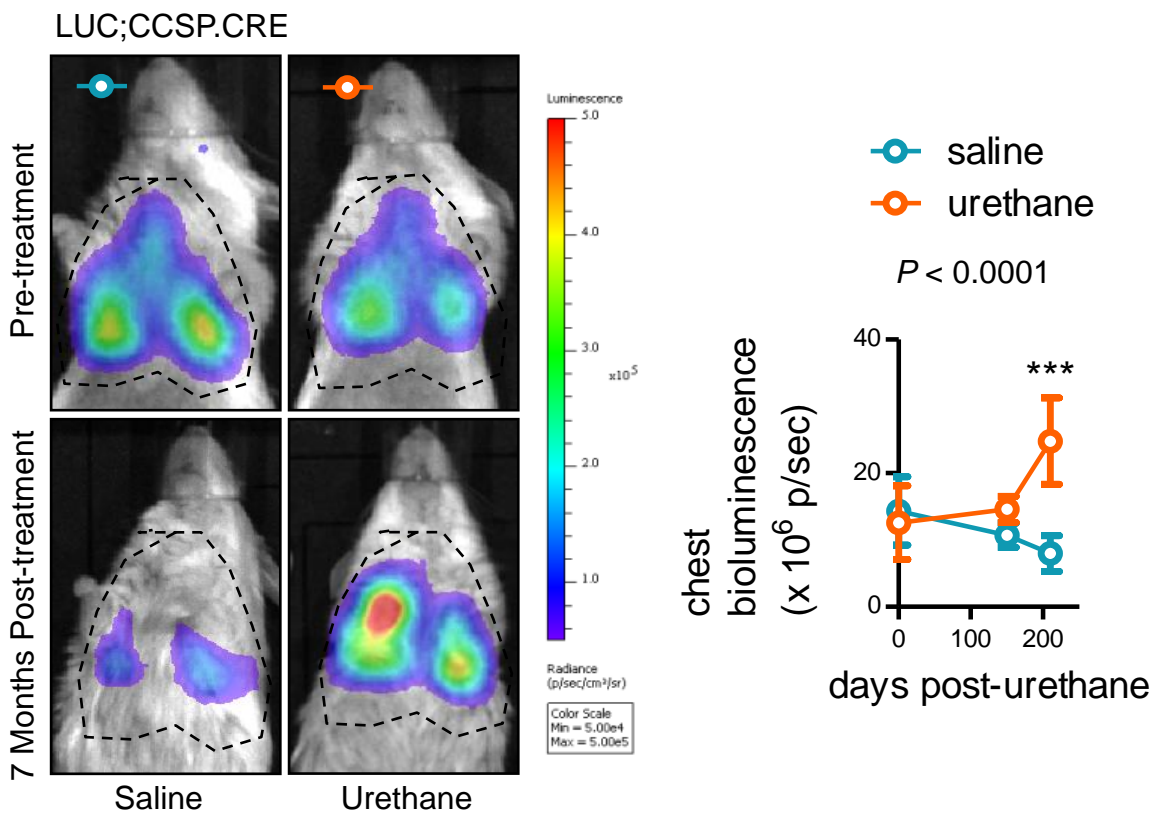

**Figure 3 - Figure Supplement 5**

Supplement: supp [file elife-45571-supp-v1.zip › elife_poa_e45571_Figure_3_figure_supplement_5.pdf]

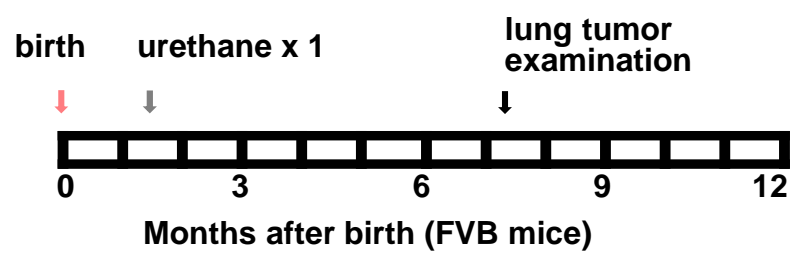

Supplement: supp [file elife-45571-supp-v1.zip › elife_poa_e45571_Figure_1_figure_supplement_17.pdf]

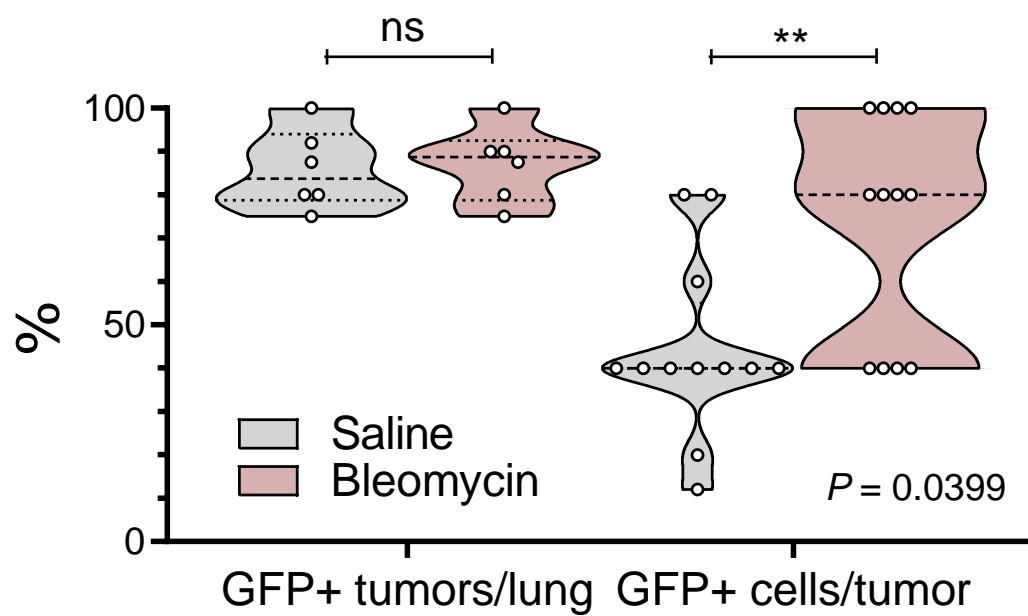

Supplement: supp [file elife-45571-supp-v1.zip › elife_poa_e45571_Figure_4_figure_supplement_2.pdf]

- TOMATO
- GFP;CCSP.CRE
- GFP;SFTPC.CRE
- GFP;LYZ2.CRE
- GFP;SOX2.CRE
- GFP;VAV.CRE
- GFP;NES.CRE

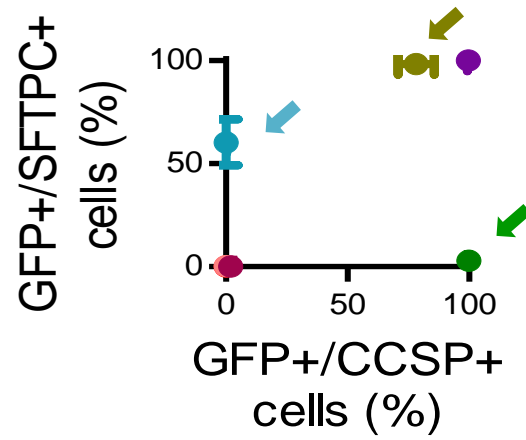

Supplement: supp [file elife-45571-supp-v1.zip › elife_poa_e45571_Figure_1_figure_supplement_7.pdf]

|   | Lung Tumors | No | Yes | %  |
|---|-------------|----|-----|----|
| o | EC          | 9  | 75  | 89 |
| o | MCA/BHT     | 2  | 18  | 90 |

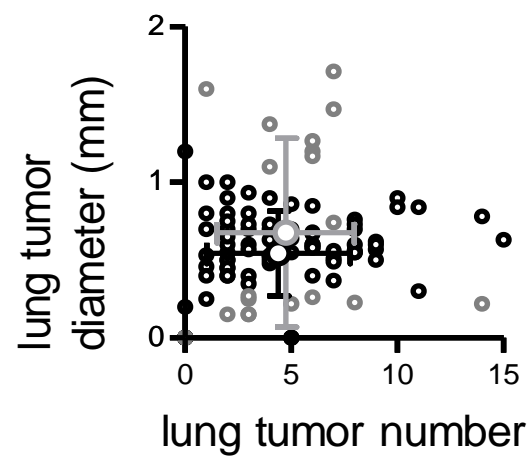

**Figure 1 - Figure Supplement 10**

Supplement: supp [file elife-45571-supp-v1.zip › elife_poa_e45571_Figure_1_figure_supplement_10.pdf]

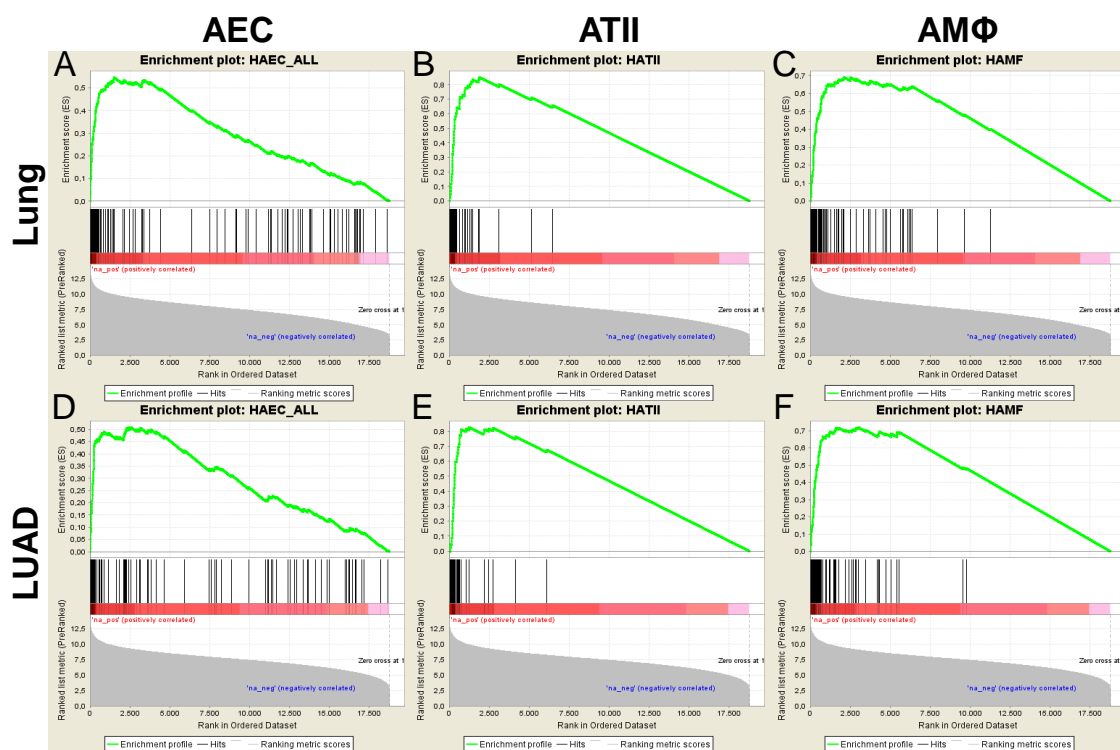

Figure 6 - Figure Supplement 6

Supplement: supp [file elife-45571-supp-v1.zip › elife_poa_e45571_Figure_6_figure_supplement_6.pdf]

|                 |      | Signature genes |            |
|-----------------|------|-----------------|------------|
|                 |      | Lung            | LUAD cells |
| Signature genes | AEC  | 23              | 25         |
|                 | ATII | 24              | 10         |
|                 | BMDM | 14              | 9          |

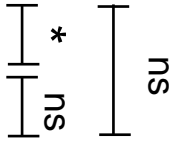

$P = 0.1168$

Supplement: supp [file elife-45571-supp-v1.zip › elife_poa_e45571_Figure_6_figure_supplement_1.pdf]

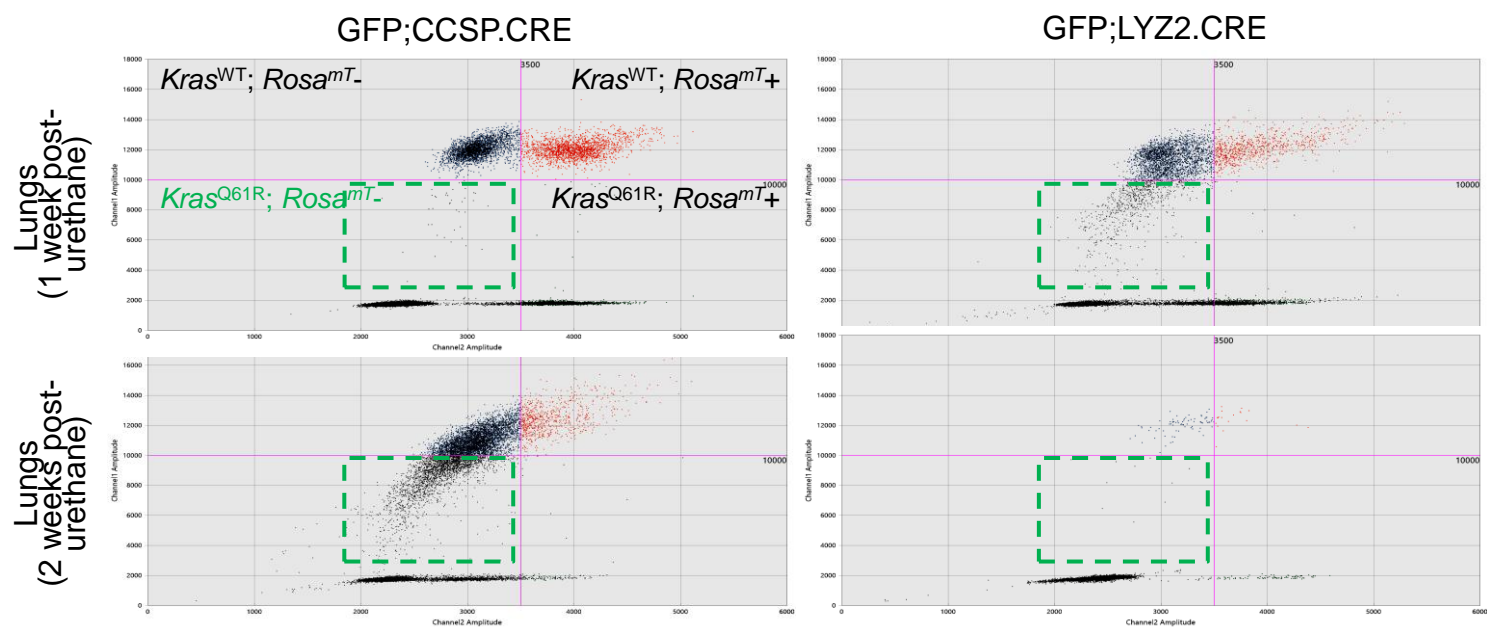

Figure 2 - Figure Supplement 1

Supplement: supp [file elife-45571-supp-v1.zip › elife_poa_e45571_Figure_2_figure_supplement_1.pdf]

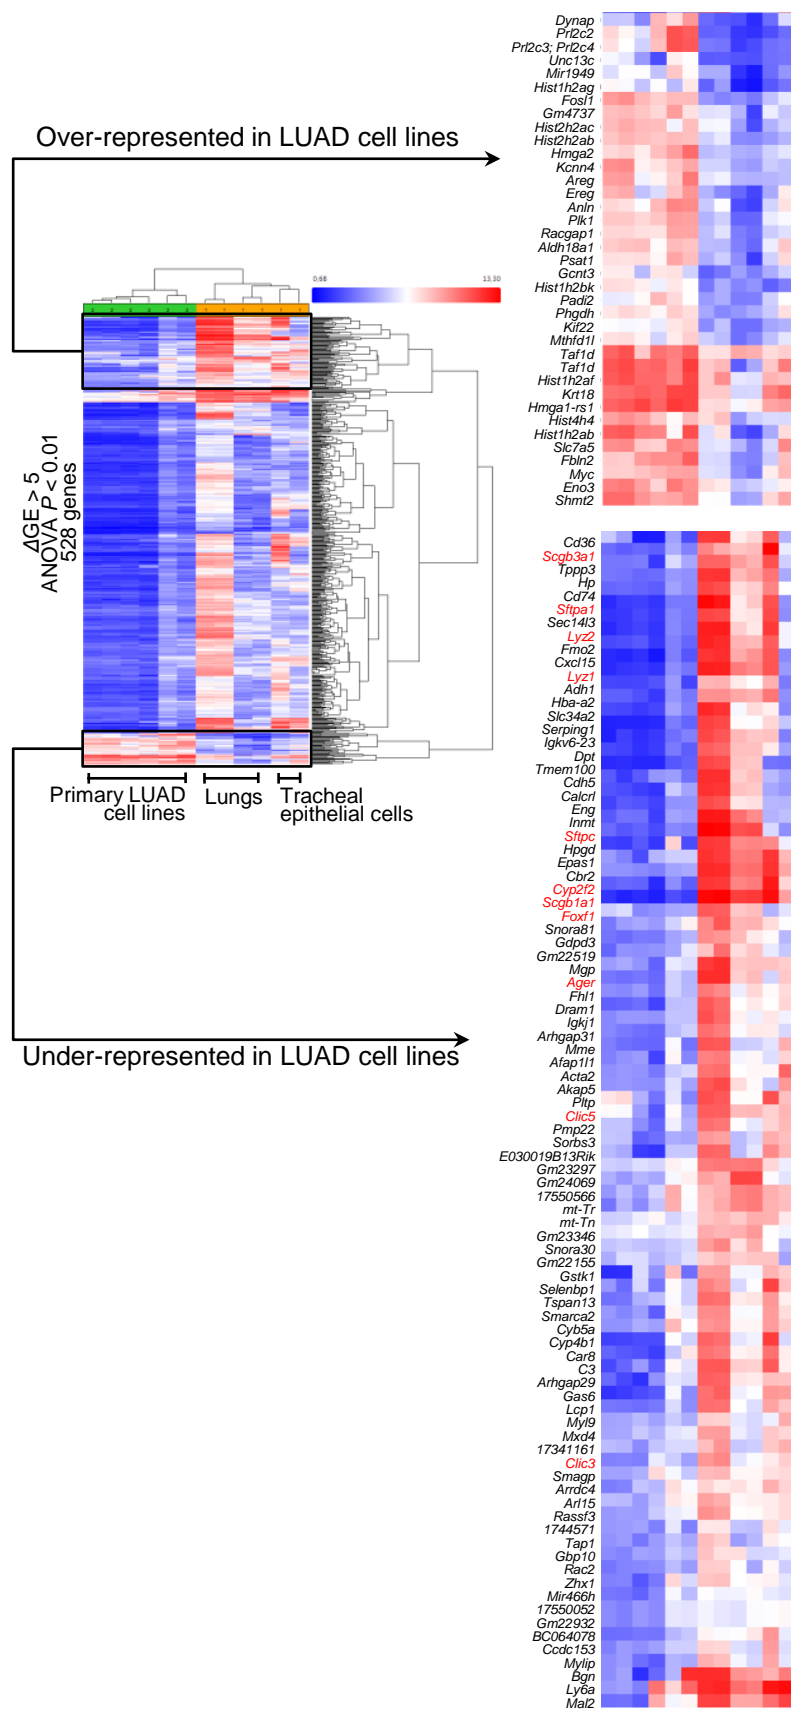

Figure 6 - Figure Supplement 3

Supplement: supp [file elife-45571-supp-v1.zip › elife_poa_e45571_Figure_6_figure_supplement_3.pdf]

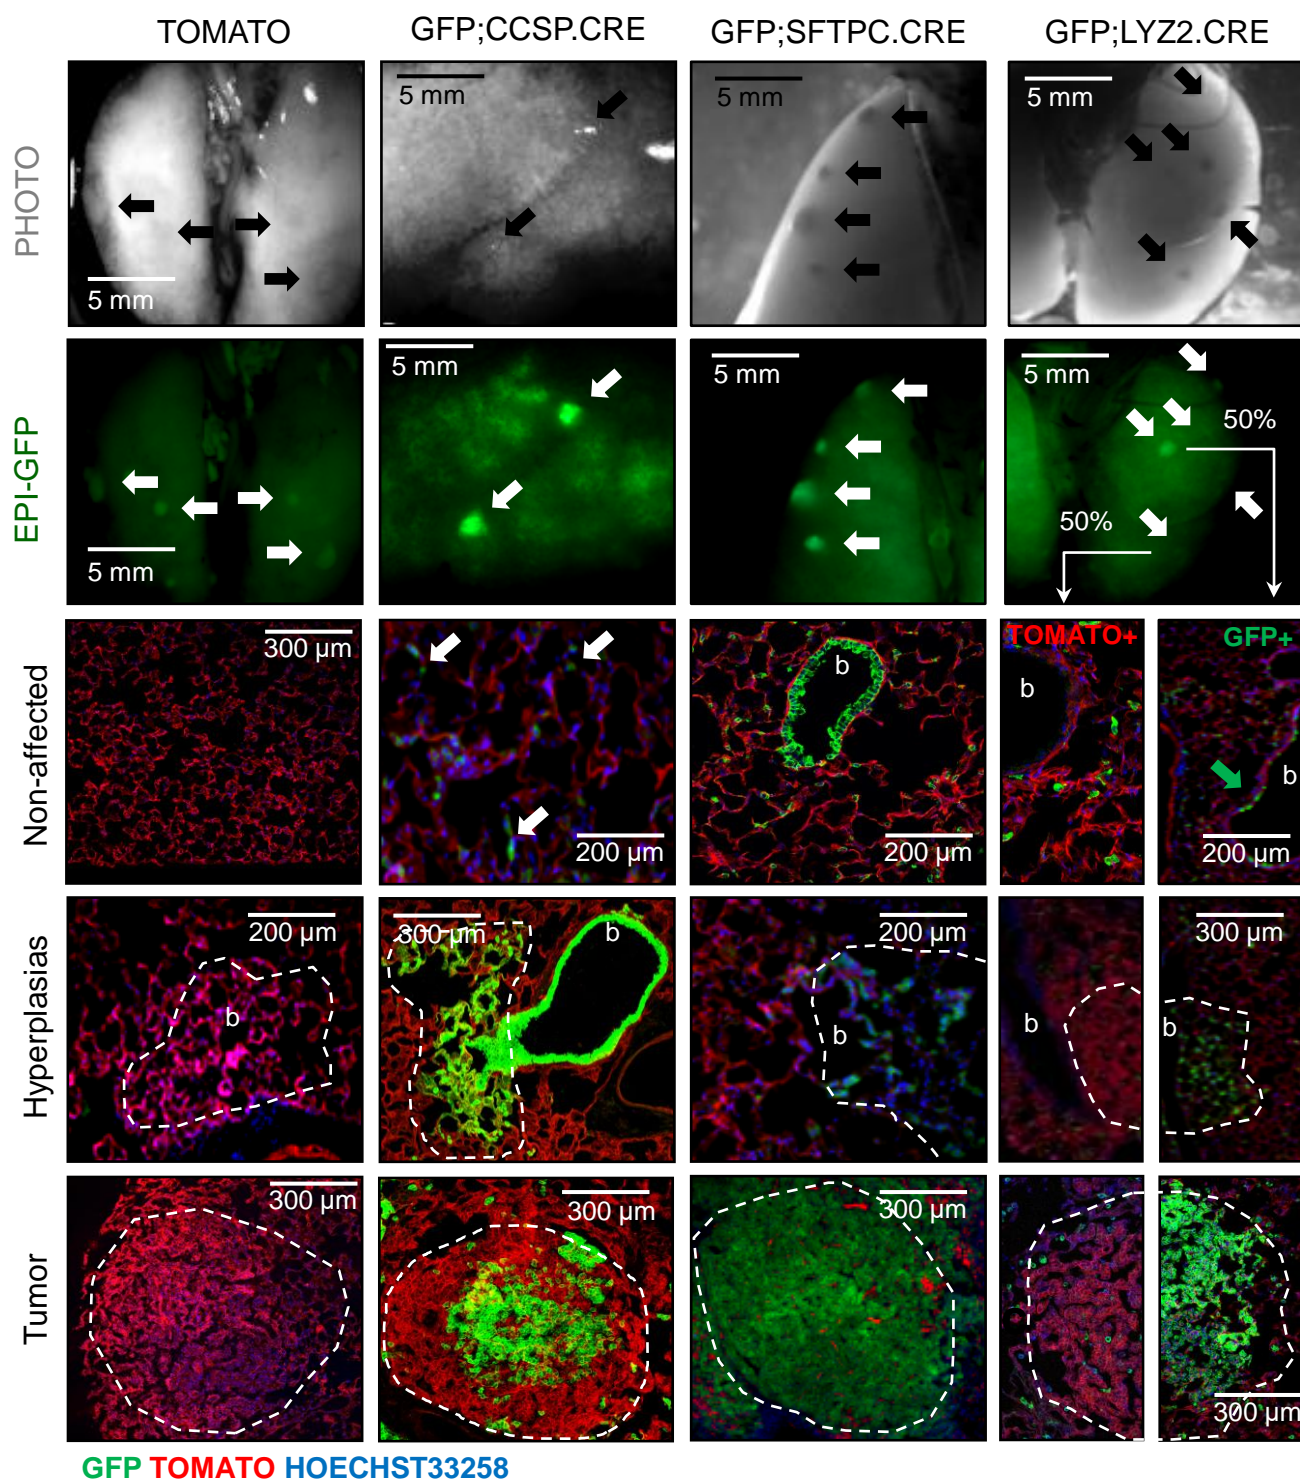

Figure 1 - Figure Supplement 12

Supplement: supp [file elife-45571-supp-v1.zip › elife_poa_e45571_Figure_1_figure_supplement_12.pdf]

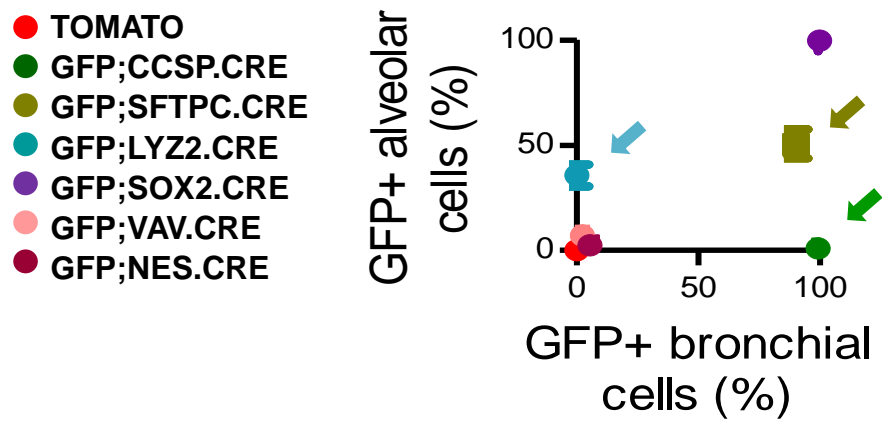

Supplement: supp [file elife-45571-supp-v1.zip › elife_poa_e45571_Figure_1_figure_supplement_4.pdf]

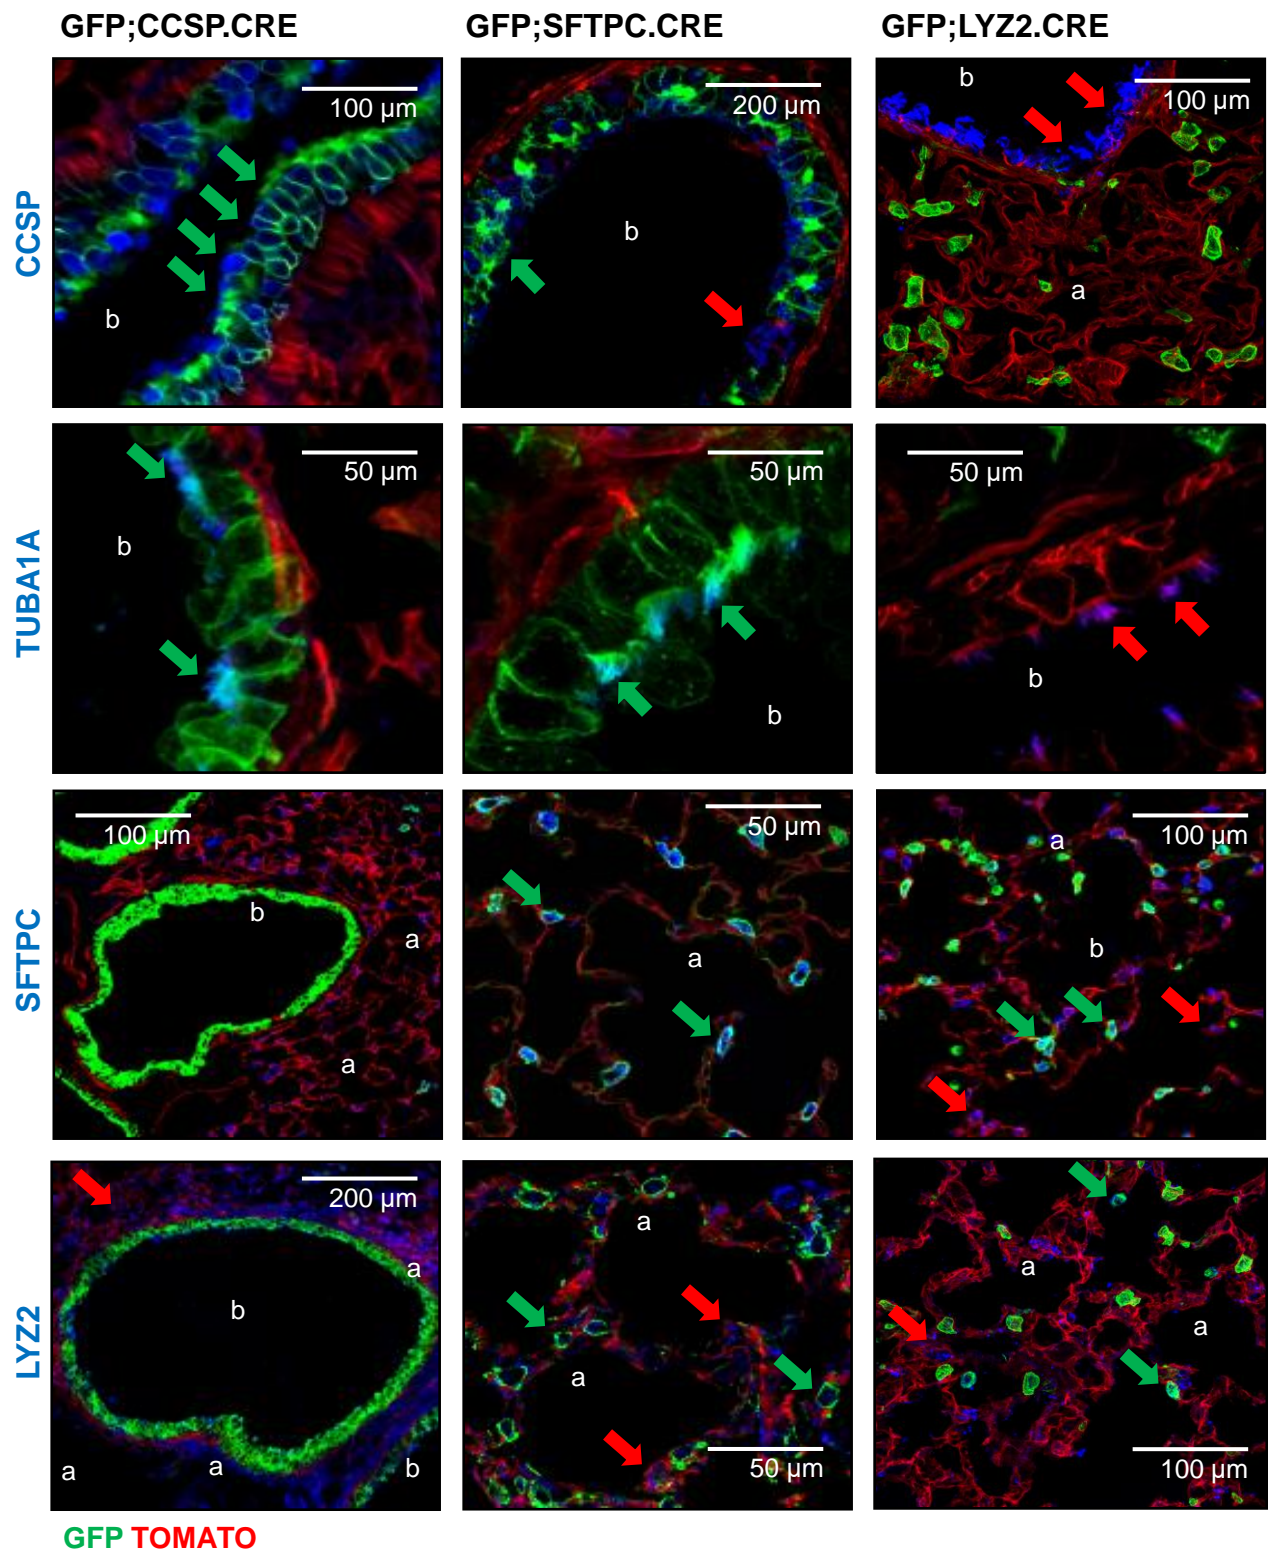

**Figure 1 - Figure Supplement 6**

Supplement: supp [file elife-45571-supp-v1.zip › elife_poa_e45571_Figure_1_figure_supplement_6.pdf]

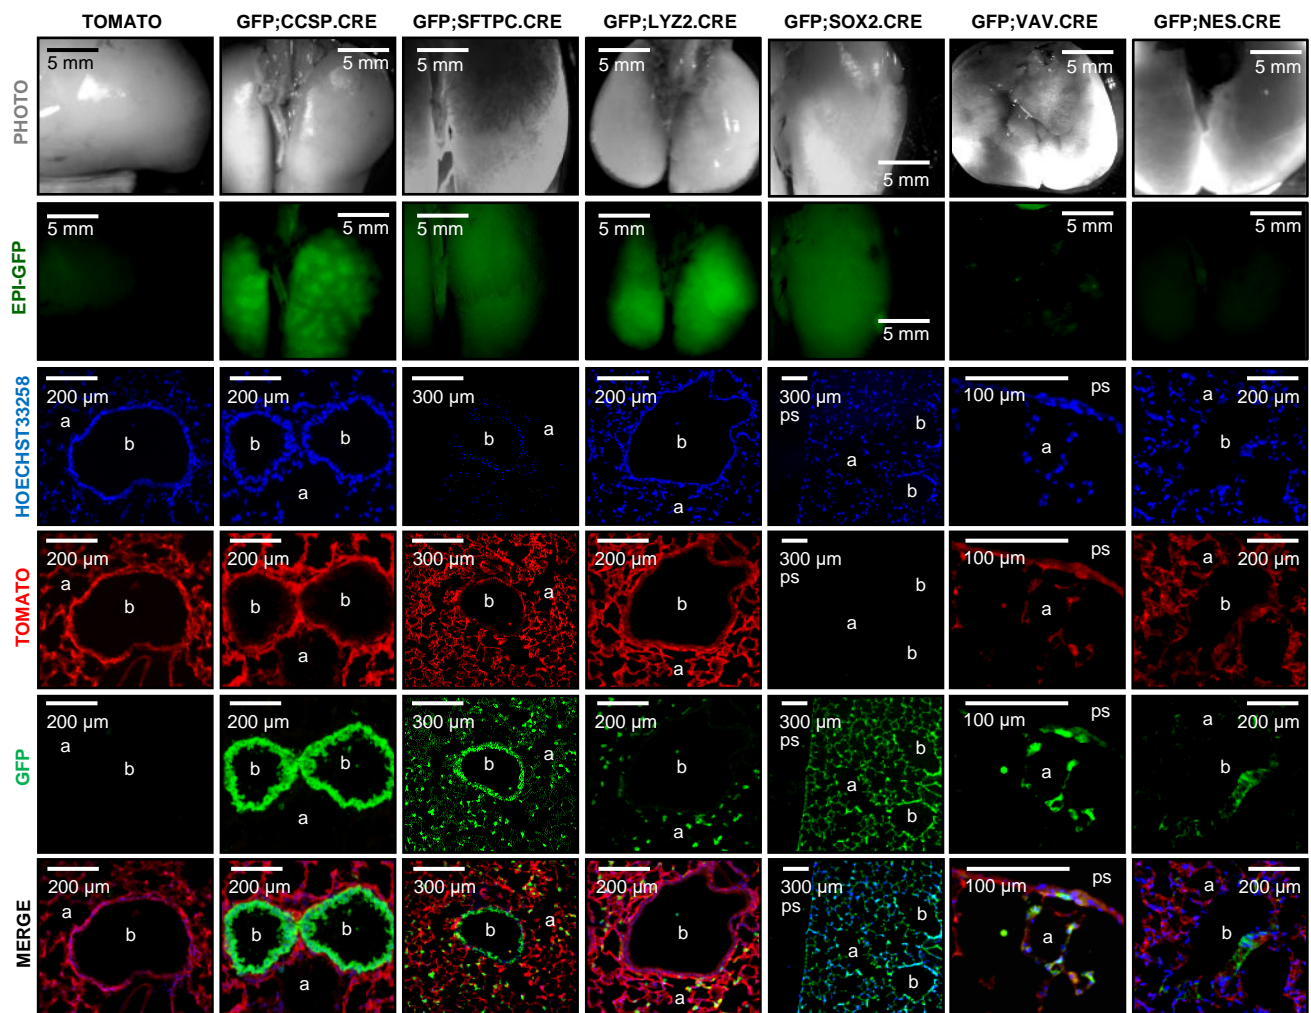

**Figure 1 - Figure Supplement 3**

Supplement: supp [file elife-45571-supp-v1.zip › elife_poa_e45571_Figure_1_figure_supplement_3.pdf]

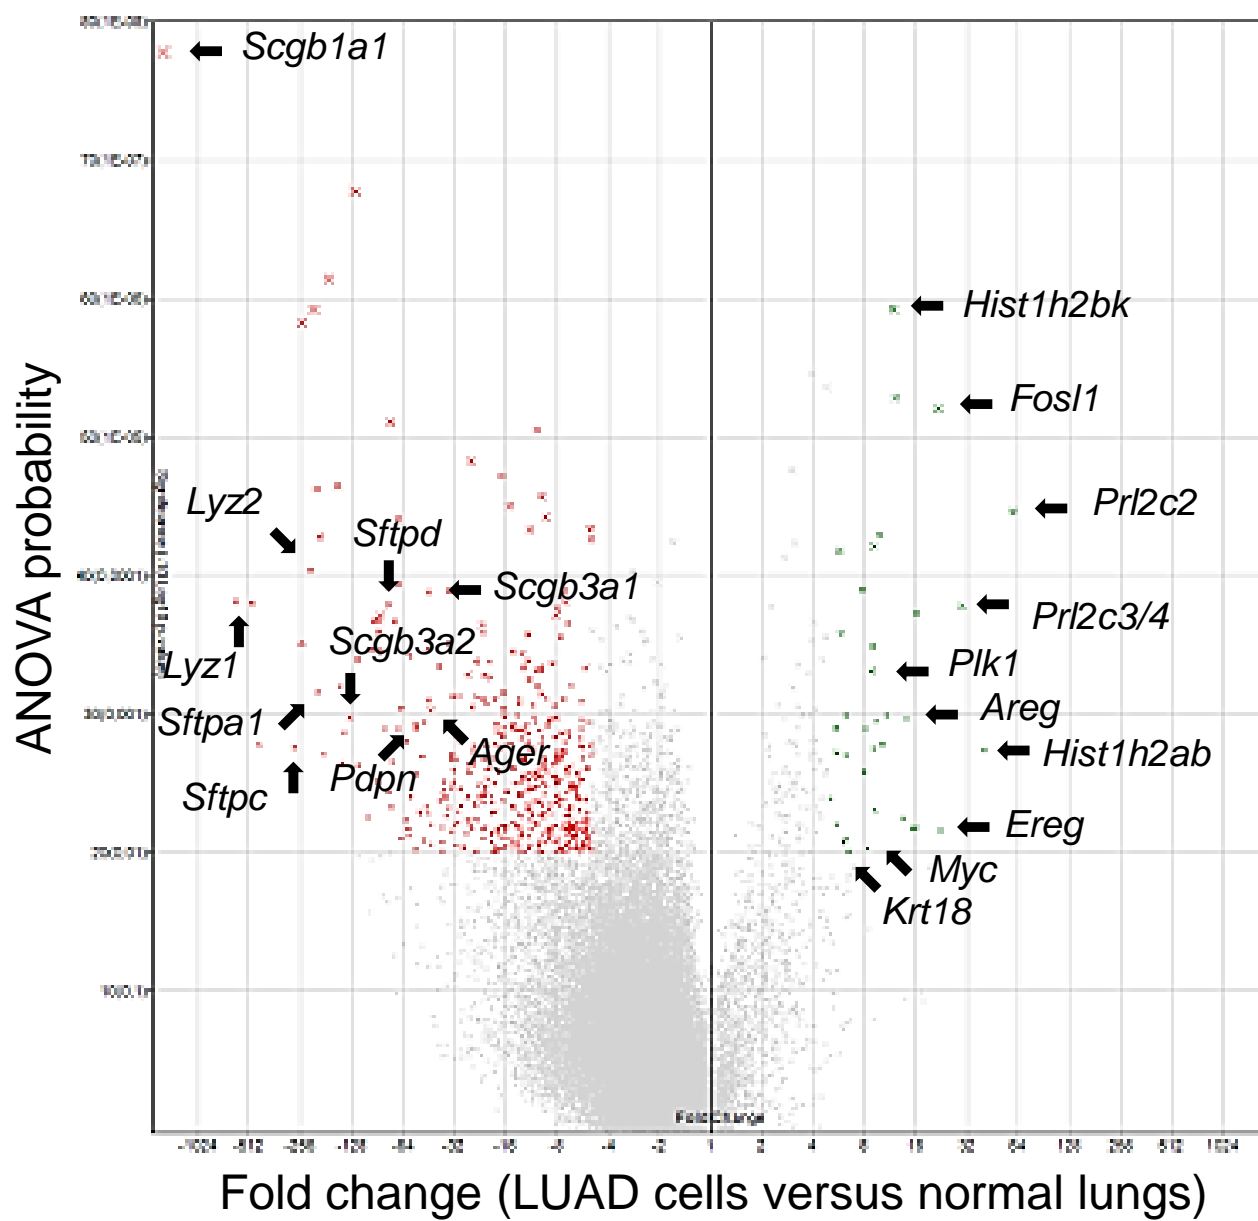

Figure 6 - Figure Supplement 4

Supplement: supp [file elife-45571-supp-v1.zip › elife_poa_e45571_Figure_6_figure_supplement_4.pdf]

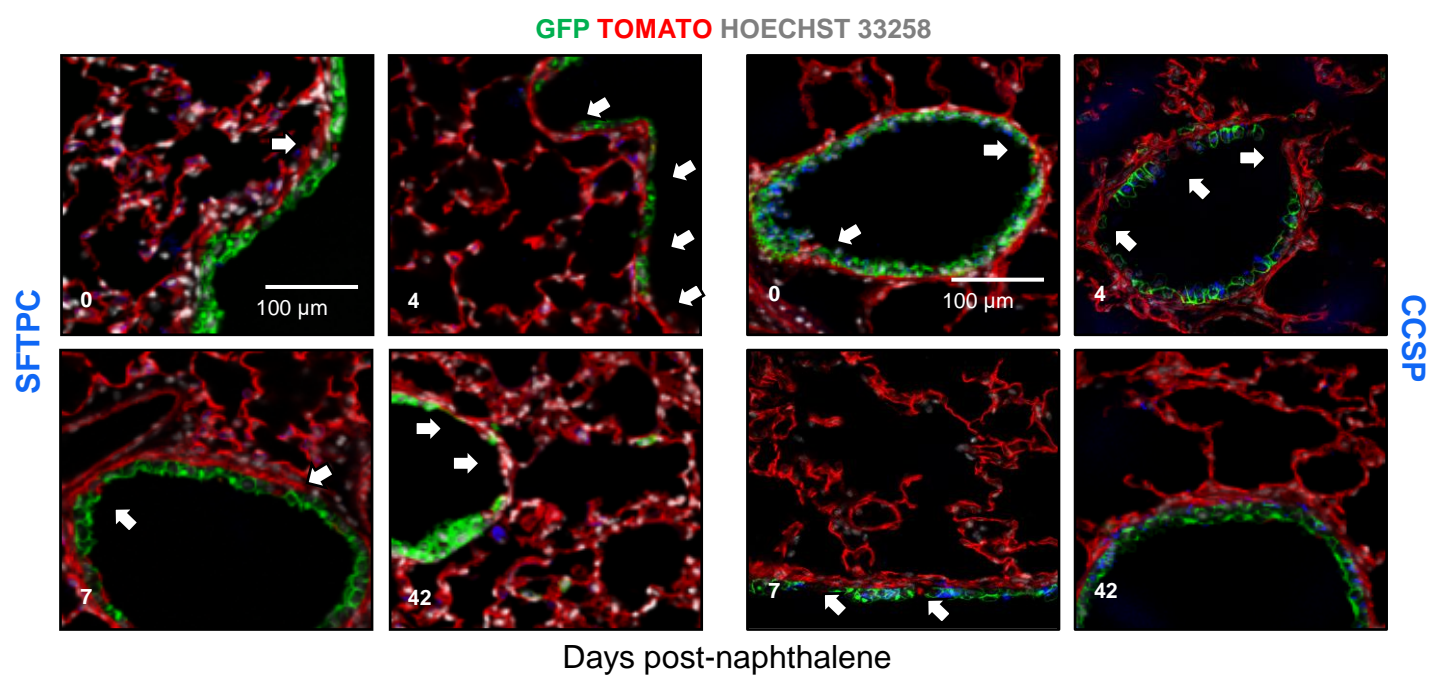

Supplement: supp [file elife-45571-supp-v1.zip › elife_poa_e45571_Figure_4_figure_supplement_3.pdf]

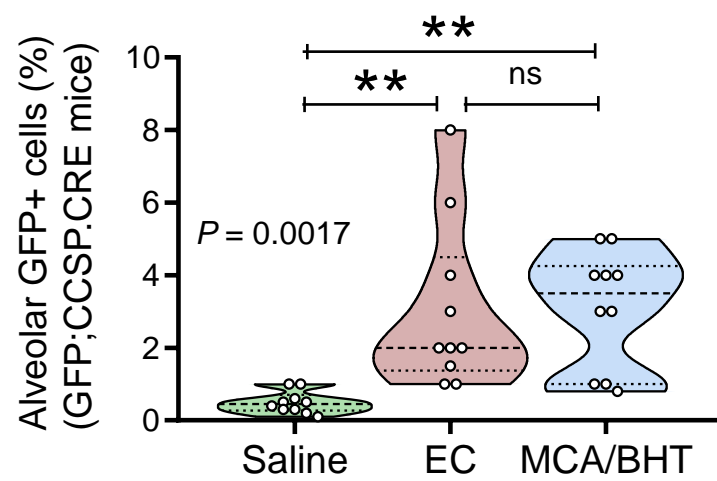

Supplement: supp [file elife-45571-supp-v1.zip › elife_poa_e45571_Figure_3_figure_supplement_2.pdf]

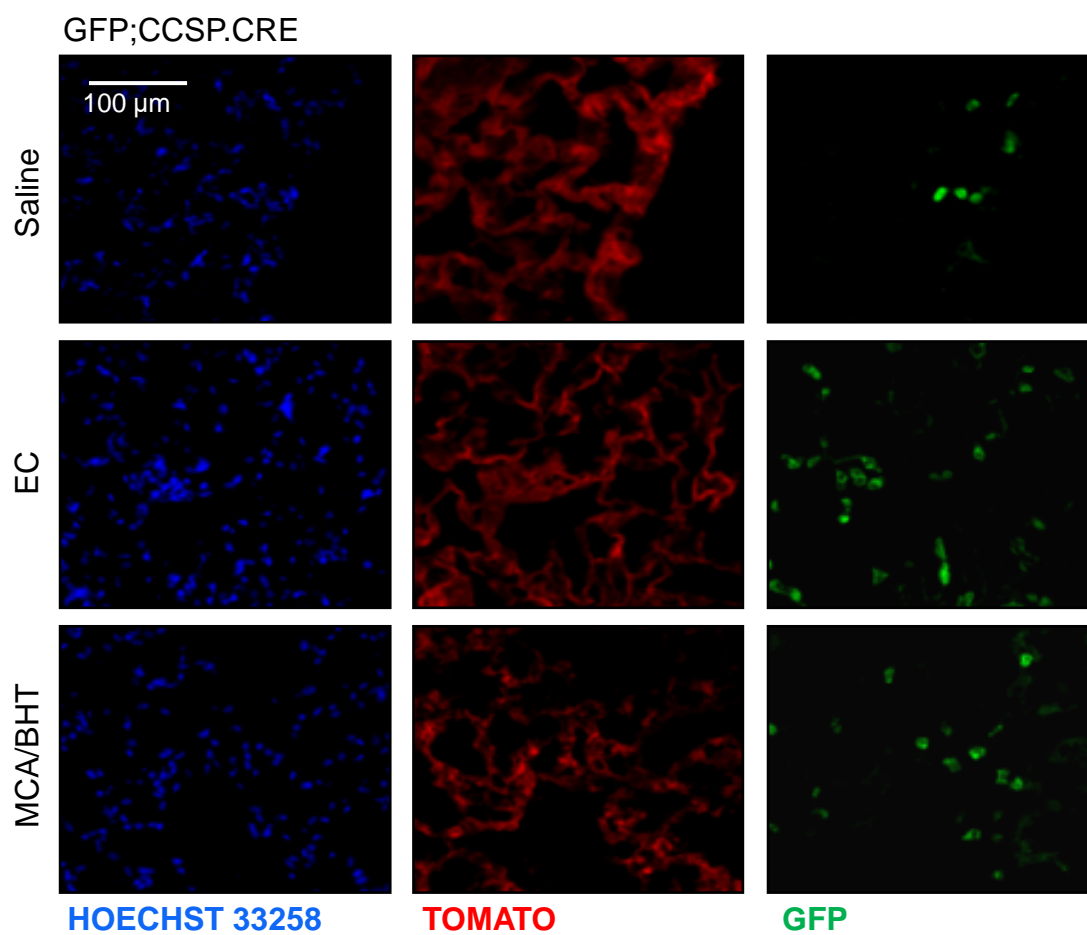

Supplement: supp [file elife-45571-supp-v1.zip › elife_poa_e45571_Figure_3_figure_supplement_1.pdf]

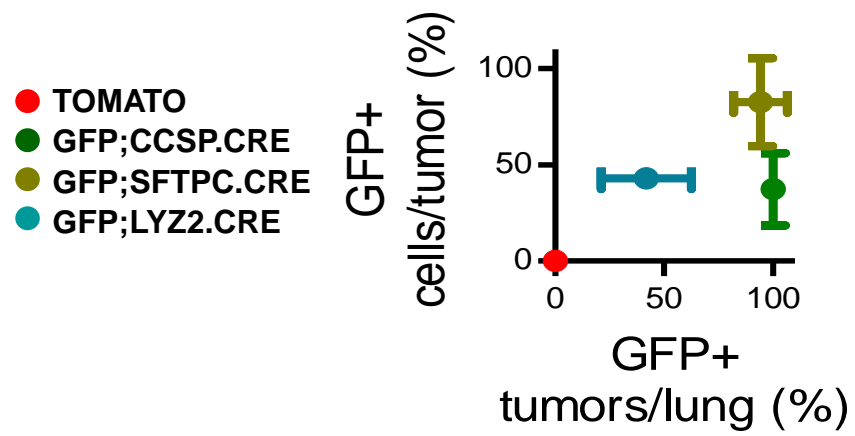

Supplement: supp [file elife-45571-supp-v1.zip › elife_poa_e45571_Figure_1_figure_supplement_13.pdf]

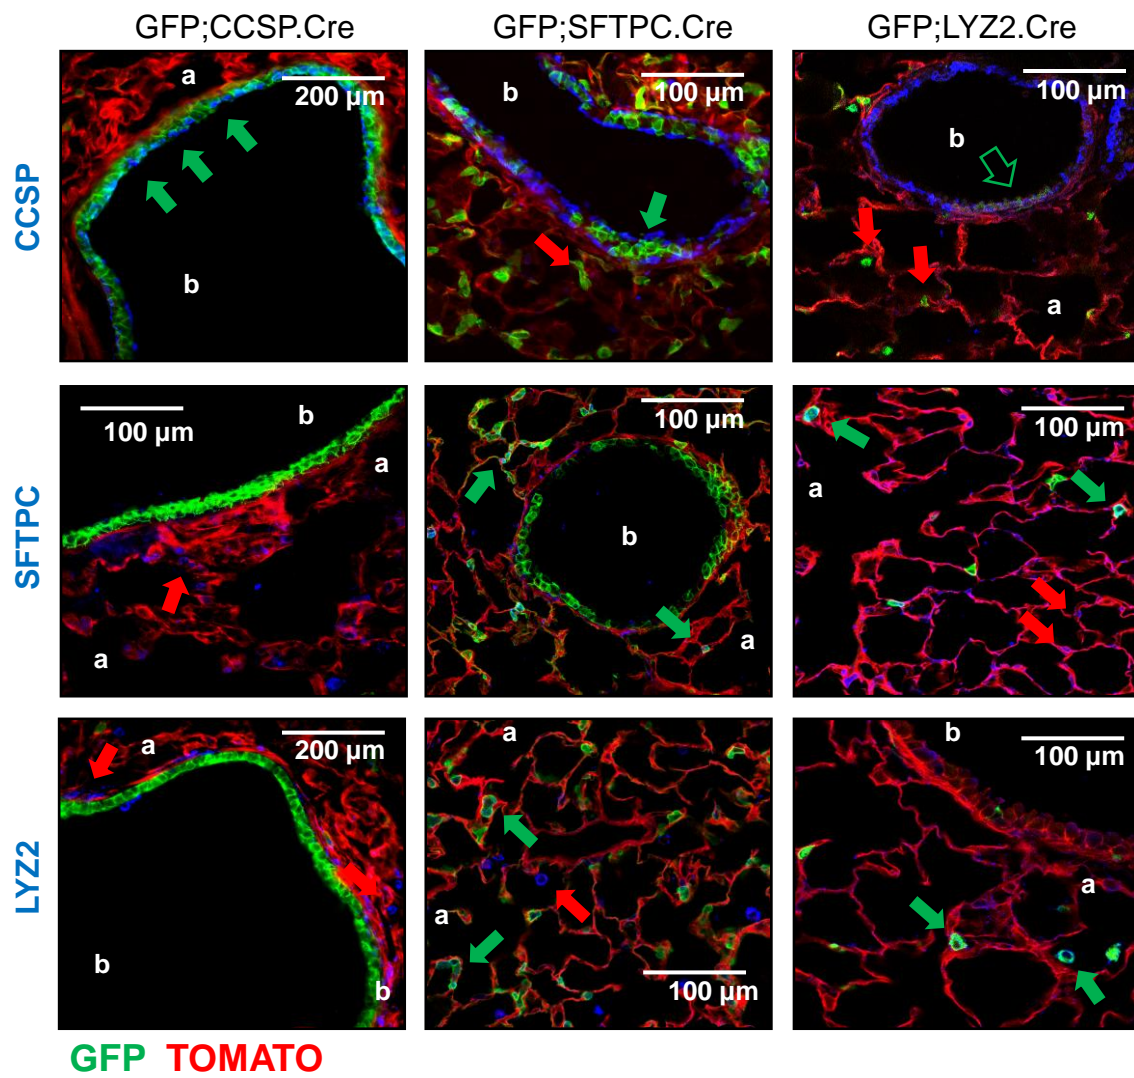

**Figure 1 - Figure Supplement 16**

Supplement: supp [file elife-45571-supp-v1.zip › elife_poa_e45571_Figure_1_figure_supplement_16.pdf]

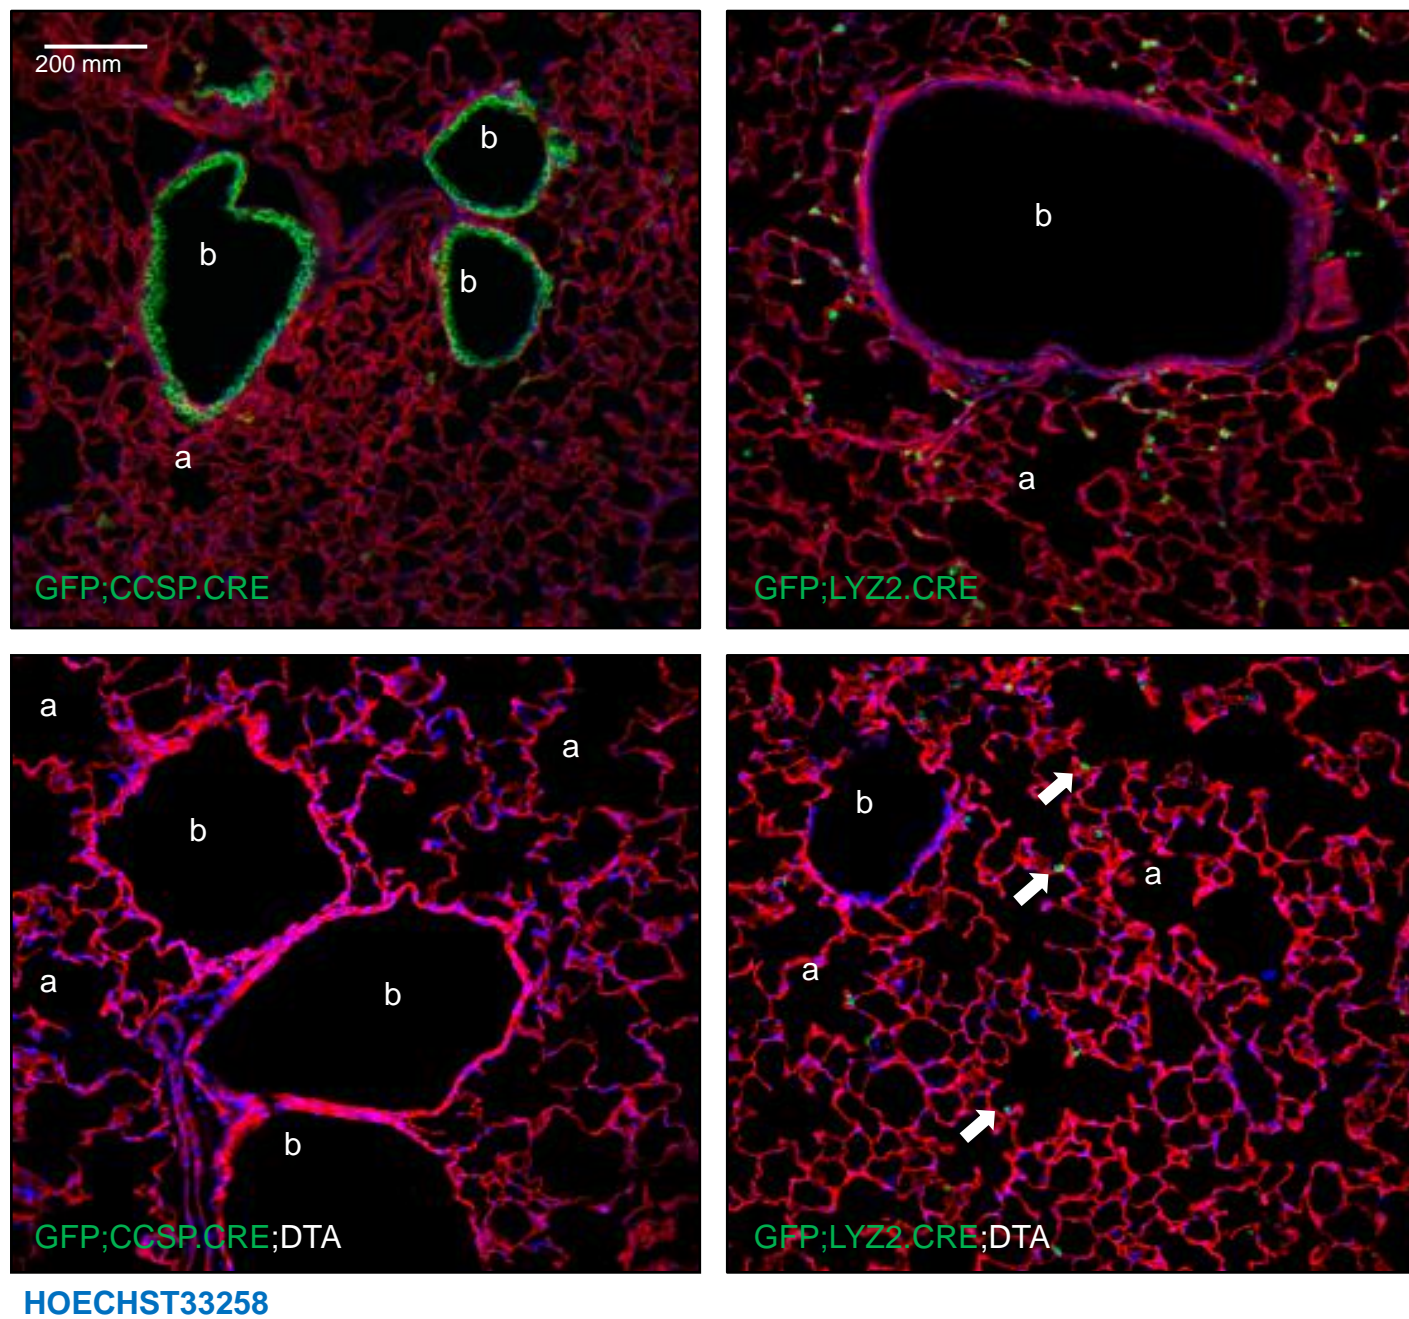

**Figure 5 - Figure Supplement 1**

Supplement: supp [file elife-45571-supp-v1.zip › elife_poa_e45571_Figure_5_figure_supplement_1.pdf]

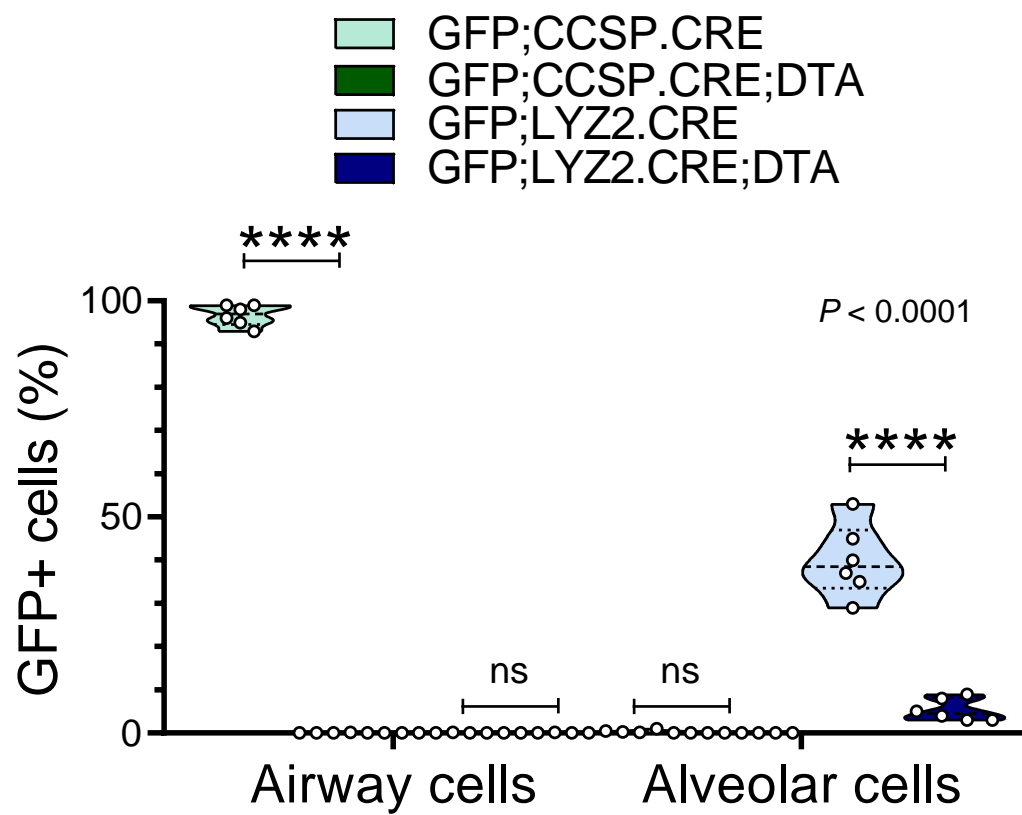

Figure 5 - Figure Supplement 2

Supplement: supp [file elife-45571-supp-v1.zip › elife_poa_e45571_Figure_5_figure_supplement_2.pdf]

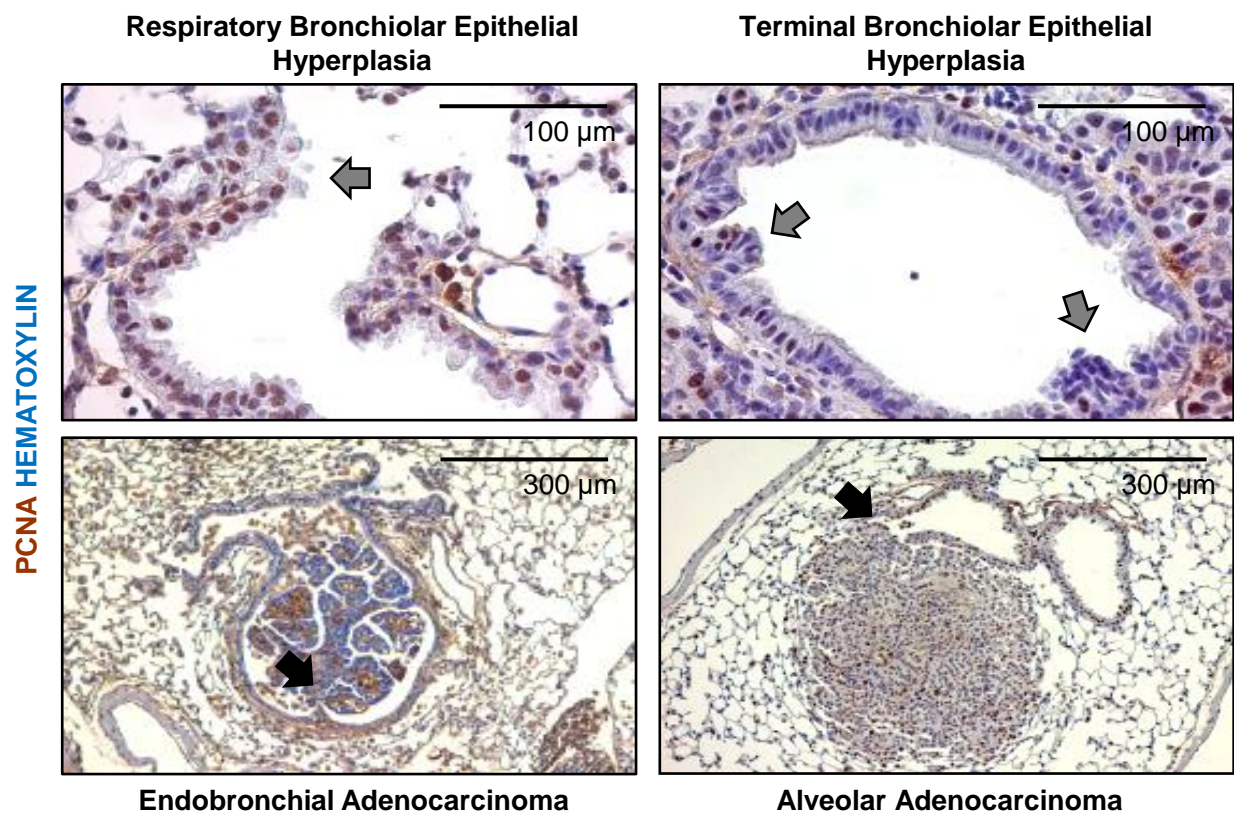

Supplement: supp [file elife-45571-supp-v1.zip › elife_poa_e45571_Figure_1_figure_supplement_11.pdf]

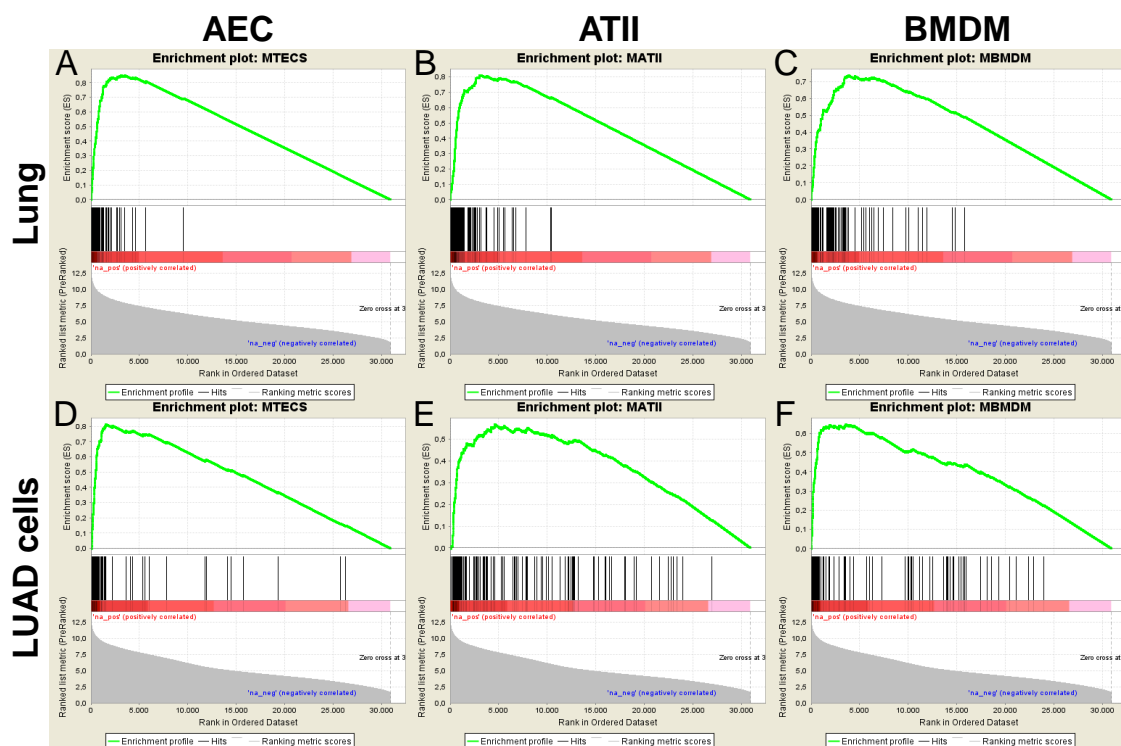

Figure 6 - Figure Supplement 5

Supplement: supp [file elife-45571-supp-v1.zip › elife_poa_e45571_Figure_6_figure_supplement_5.pdf]

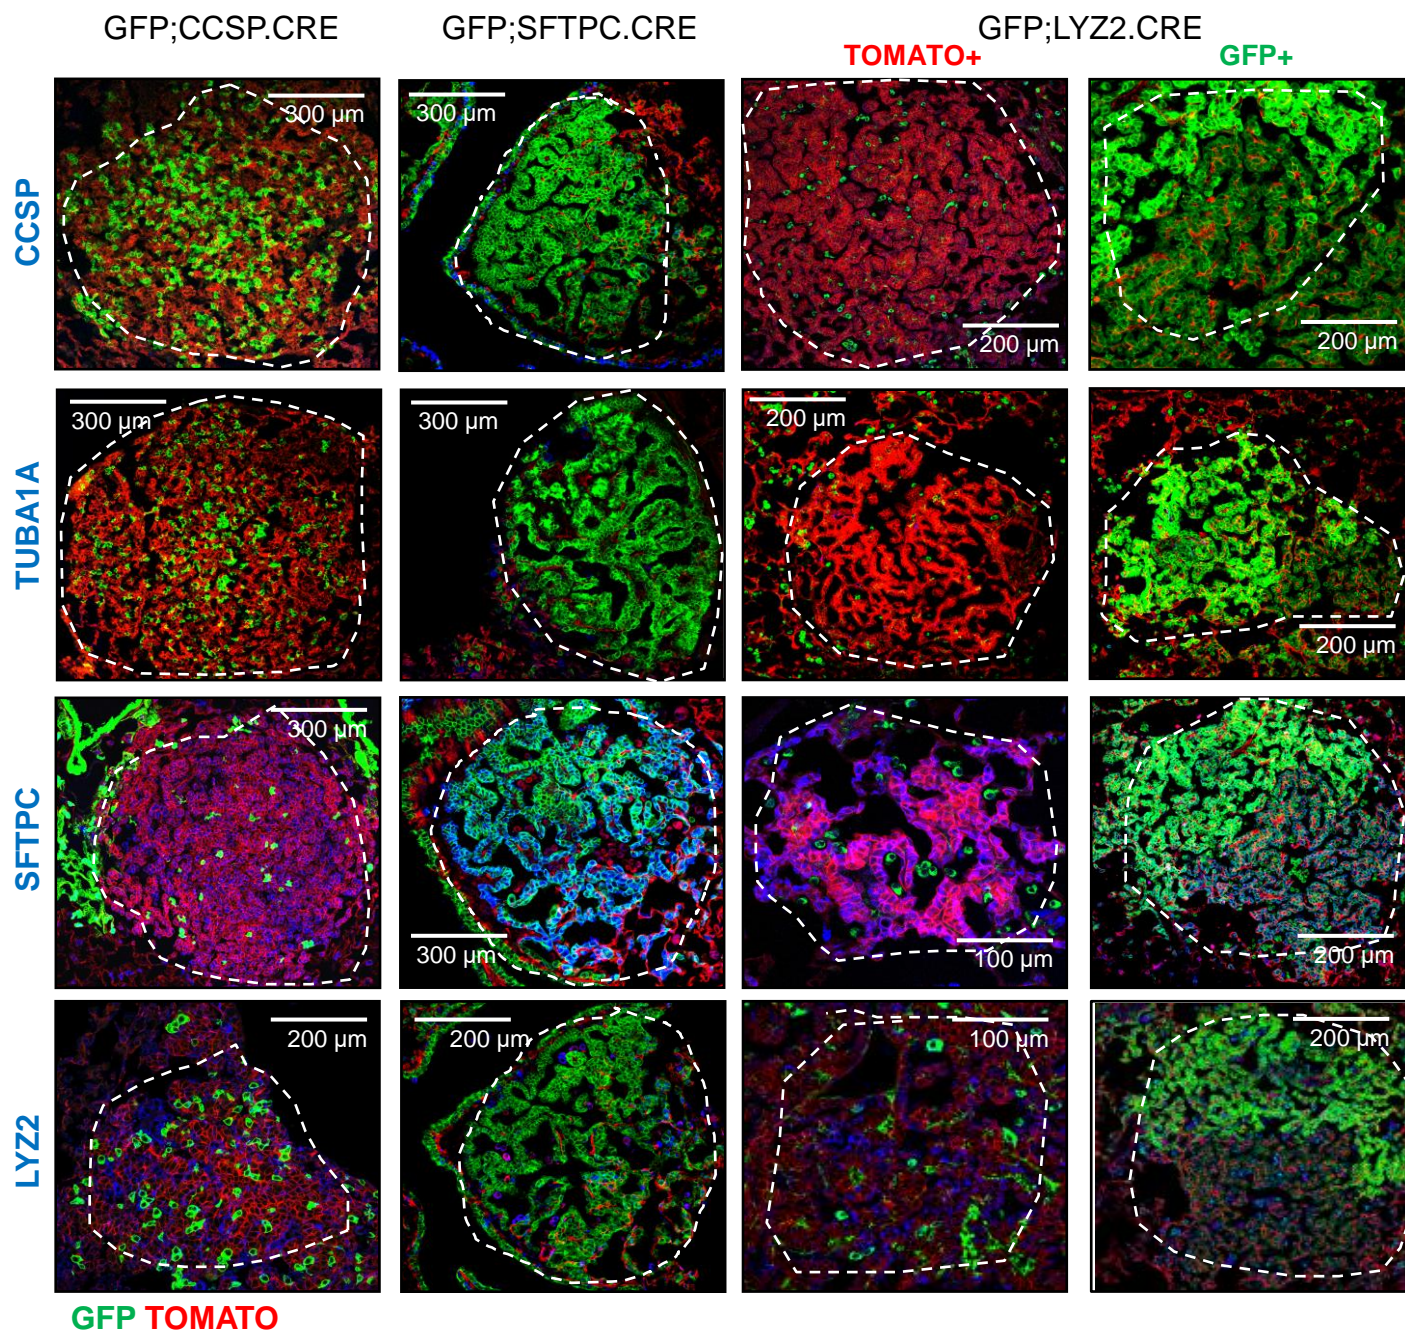

Figure 1 - Figure Supplement 15

Supplement: supp [file elife-45571-supp-v1.zip › elife_poa_e45571_Figure_1_figure_supplement_15.pdf]

A

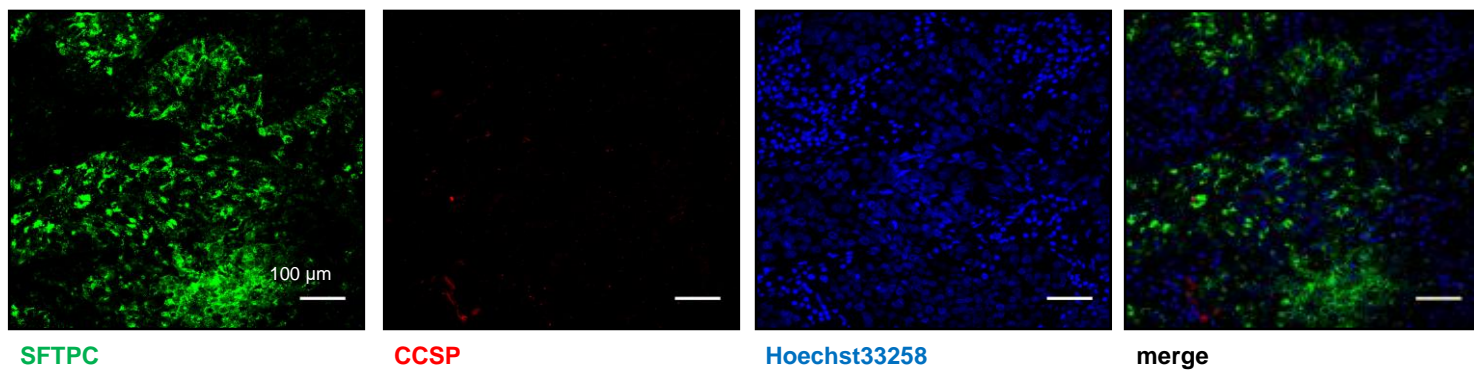

B

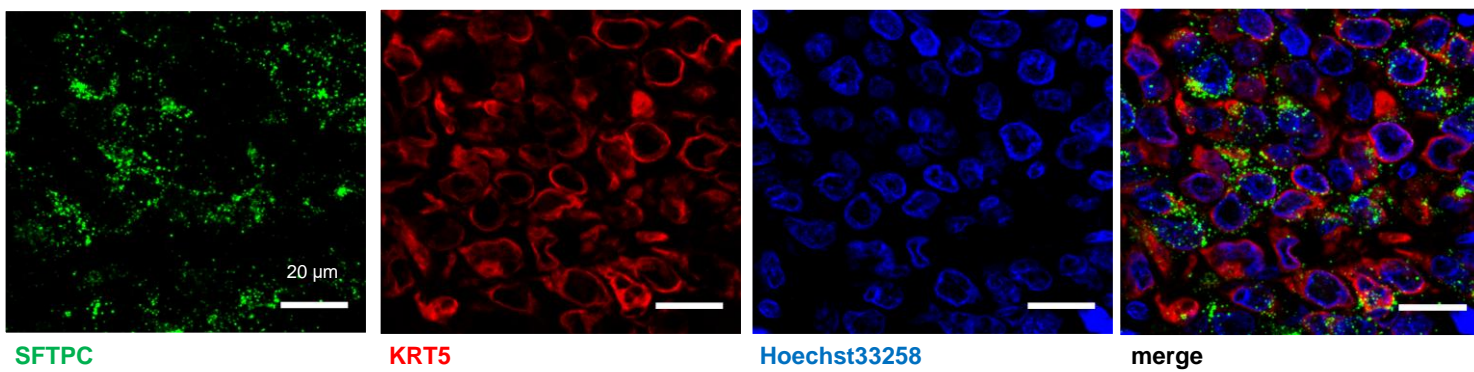

Supplement: supp [file elife-45571-supp-v1.zip › elife_poa_e45571_Figure_3_figure_supplement_6.pdf]

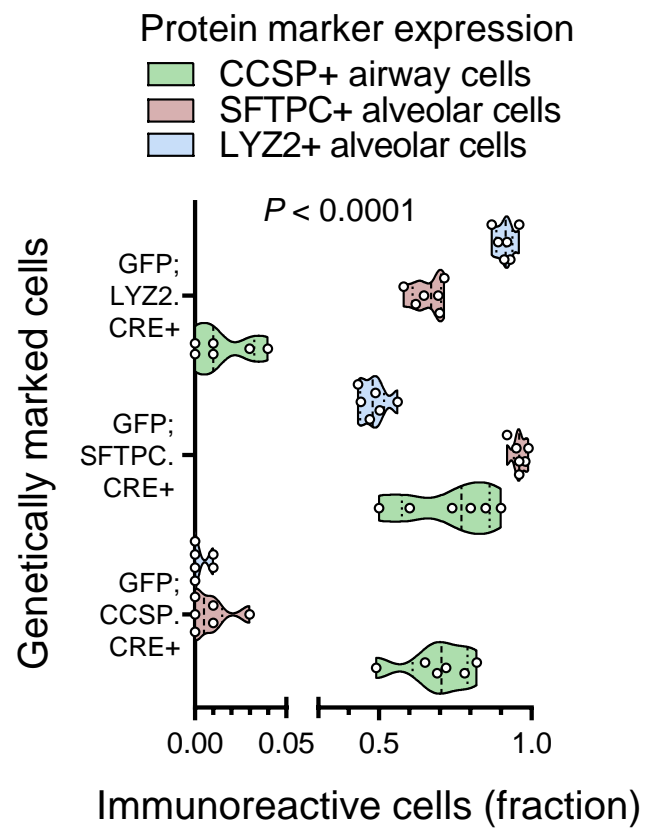

Supplement: supp [file elife-45571-supp-v1.zip › elife_poa_e45571_Figure_1_figure_supplement_8.pdf]

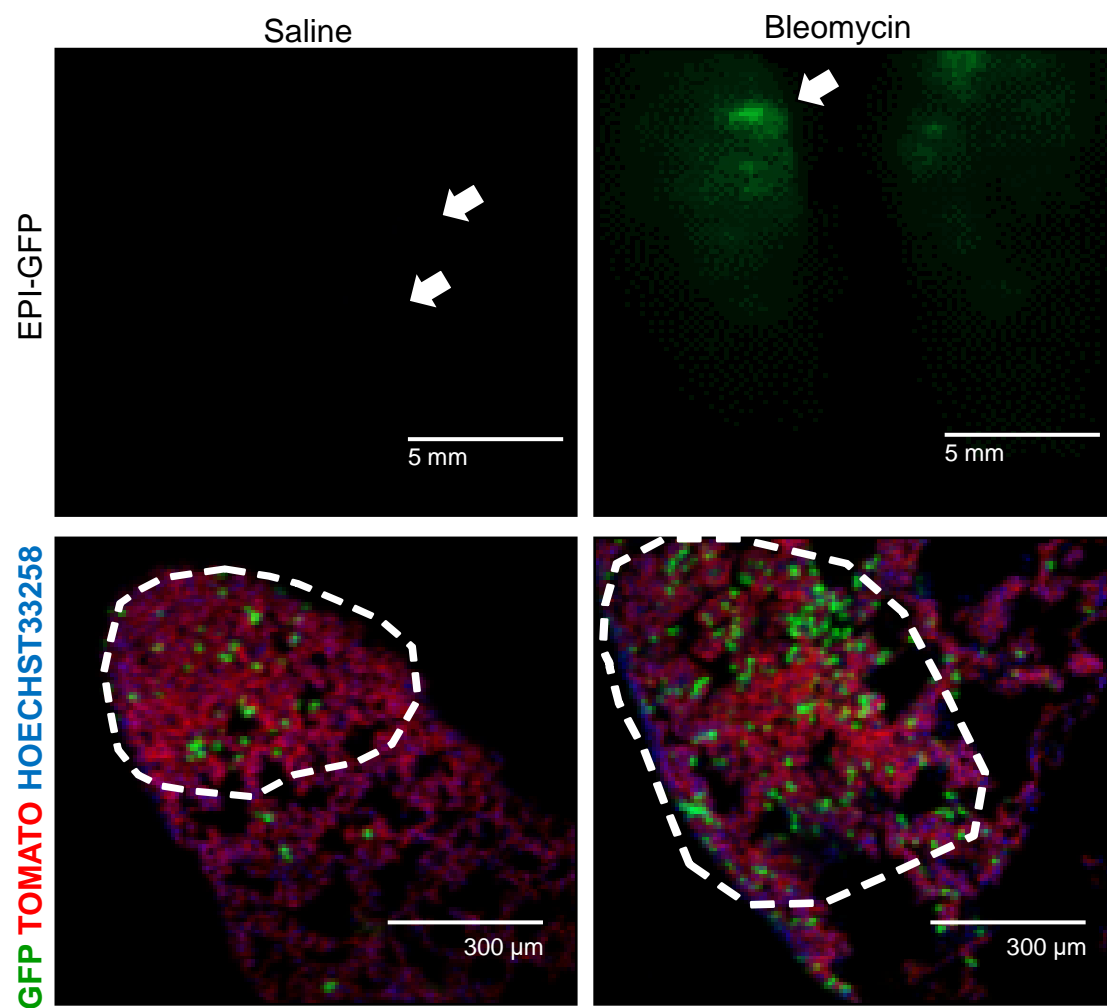

Supplement: supp [file elife-45571-supp-v1.zip › elife_poa_e45571_Figure_4_figure_supplement_1.pdf]

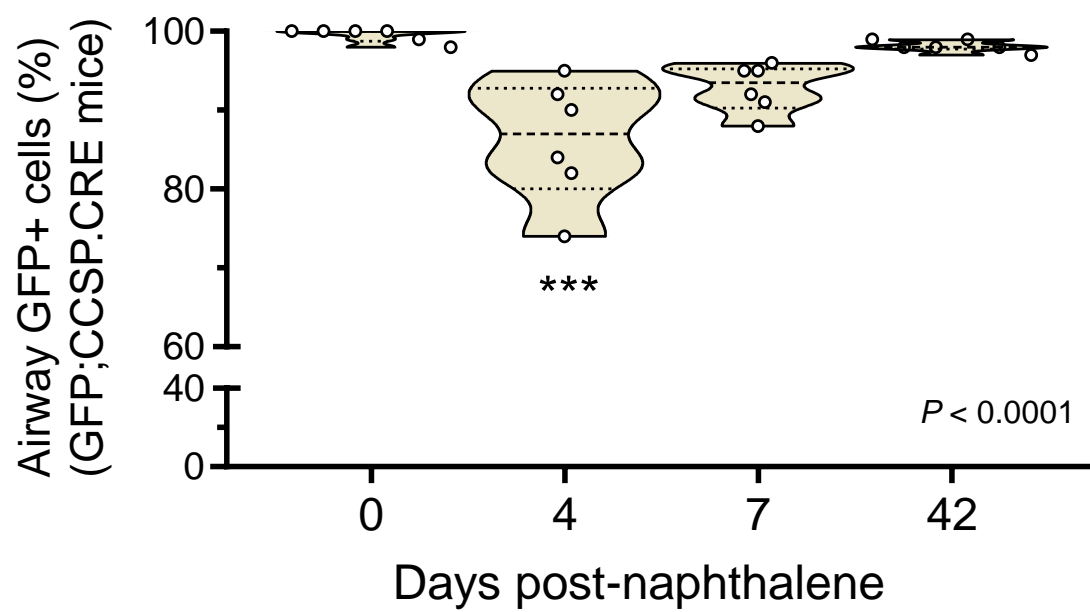

Supplement: supp [file elife-45571-supp-v1.zip › elife_poa_e45571_Figure_4_figure_supplement_4.pdf]
